# Supplementary material
Source: PubMed Central journal article supplement (PMC11374129)
Supplement: NIHMS2018008-supplement-Singhal-33175092-figs_tables.pdf [file NIHMS2018008-supplement-Singhal-33175092-figs_tables.pdf]

Supplementary Figure 1.

a.

| Functional Categories                   | Frequency in the genome<br>N (%) | Frequency in our candidate list<br>N (%) |
|-----------------------------------------|----------------------------------|------------------------------------------|
| Regulatory Proteins                     | 195 (4.77)                       | 53 (29.61)                               |
| Intermediary Metabolism and Respiration | 923 (22.57)                      | 39 (21.79)                               |
| Cell Wall and Cell Processes            | 773 (18.90)                      | 30 (16.76)                               |
| Information Pathways                    | 241 (5.89)                       | 24 (13.41)                               |
| Virulence, Detoxification, Adaptation   | 228 (5.57)                       | 13 (7.26)                                |
| Lipid Metabolism                        | 247 (6.04)                       | 15 (8.33)                                |
| Conserved Hypothetical Proteins         | 1081 (26.43)                     | 5 (2.79)                                 |
| PE/PPE                                  | 168 (4.11)                       | 1 (0.56)                                 |
| Stable RNAs                             | 71 (1.74)                        | 0 (0.00)                                 |
| Insertion Sequences and Phages          | 147 (3.59)                       | 0 (0.00)                                 |
| Unknown                                 | 16 (0.39)                        | 0 (0.00)                                 |
| Total                                   | 4090                             | 180                                      |

b.

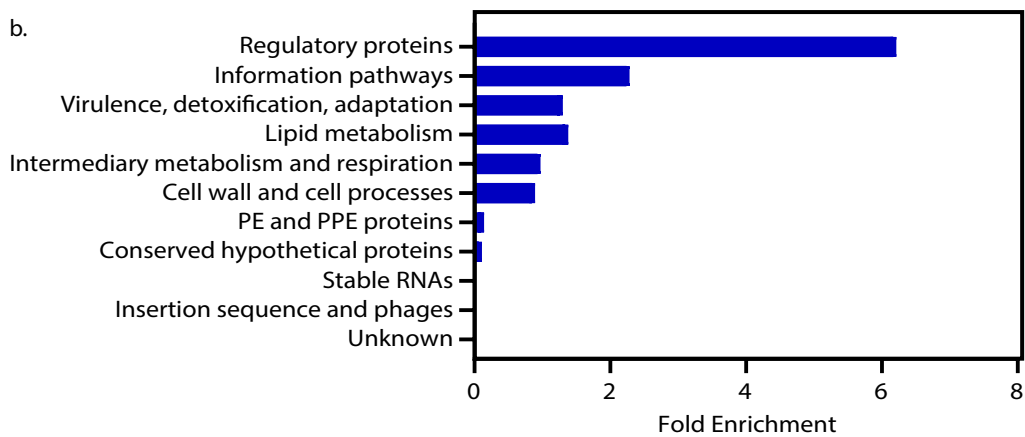

**Figure S1: Functional classification of candidate protein-coding genes.** **(a)** Frequency of genes in the *Mtb* proteome and in our list of 180 candidates categorized based on their functional categories. **(b)** Fold enrichment of each functional category in the list of 180 candidate proteins over that in the *Mtb* proteome.

# Supplementary Figure 2a-d

a.

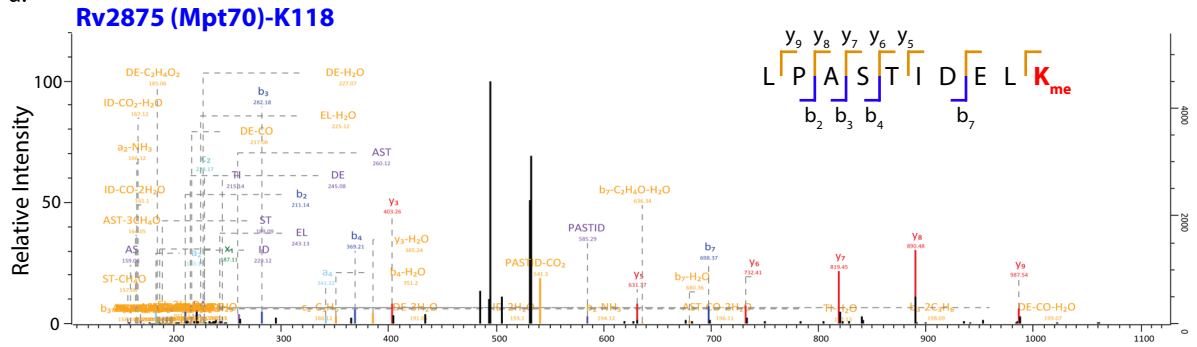

b.

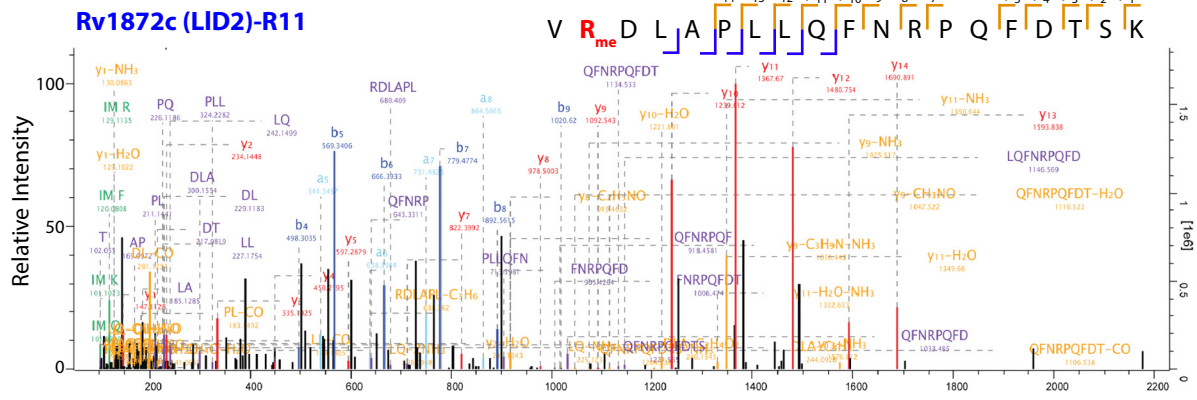

c.

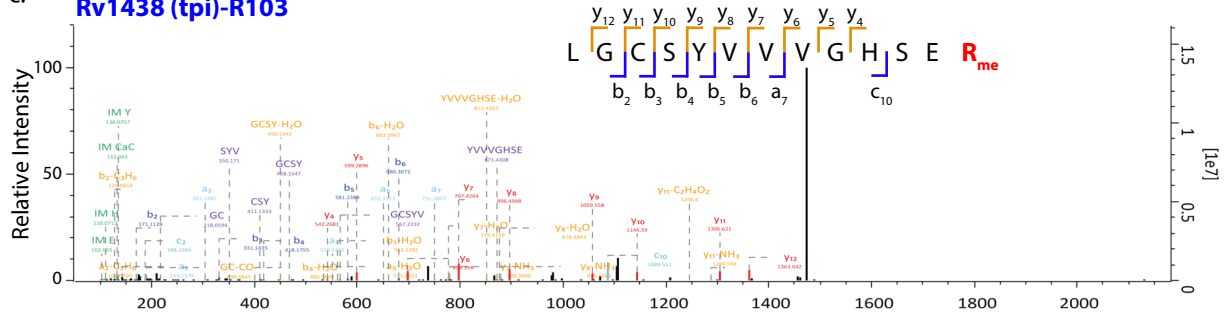

d.

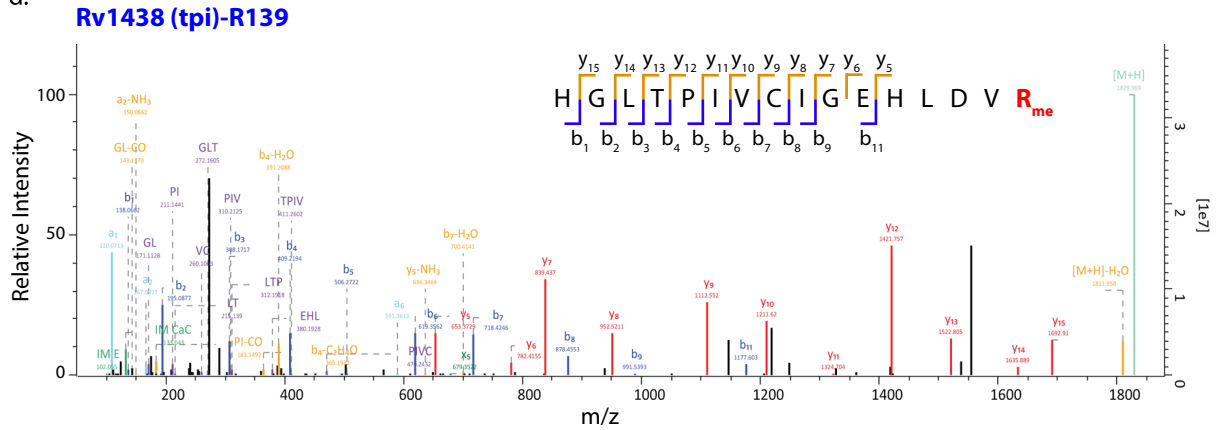

# Supplementary Figure 2e-2h

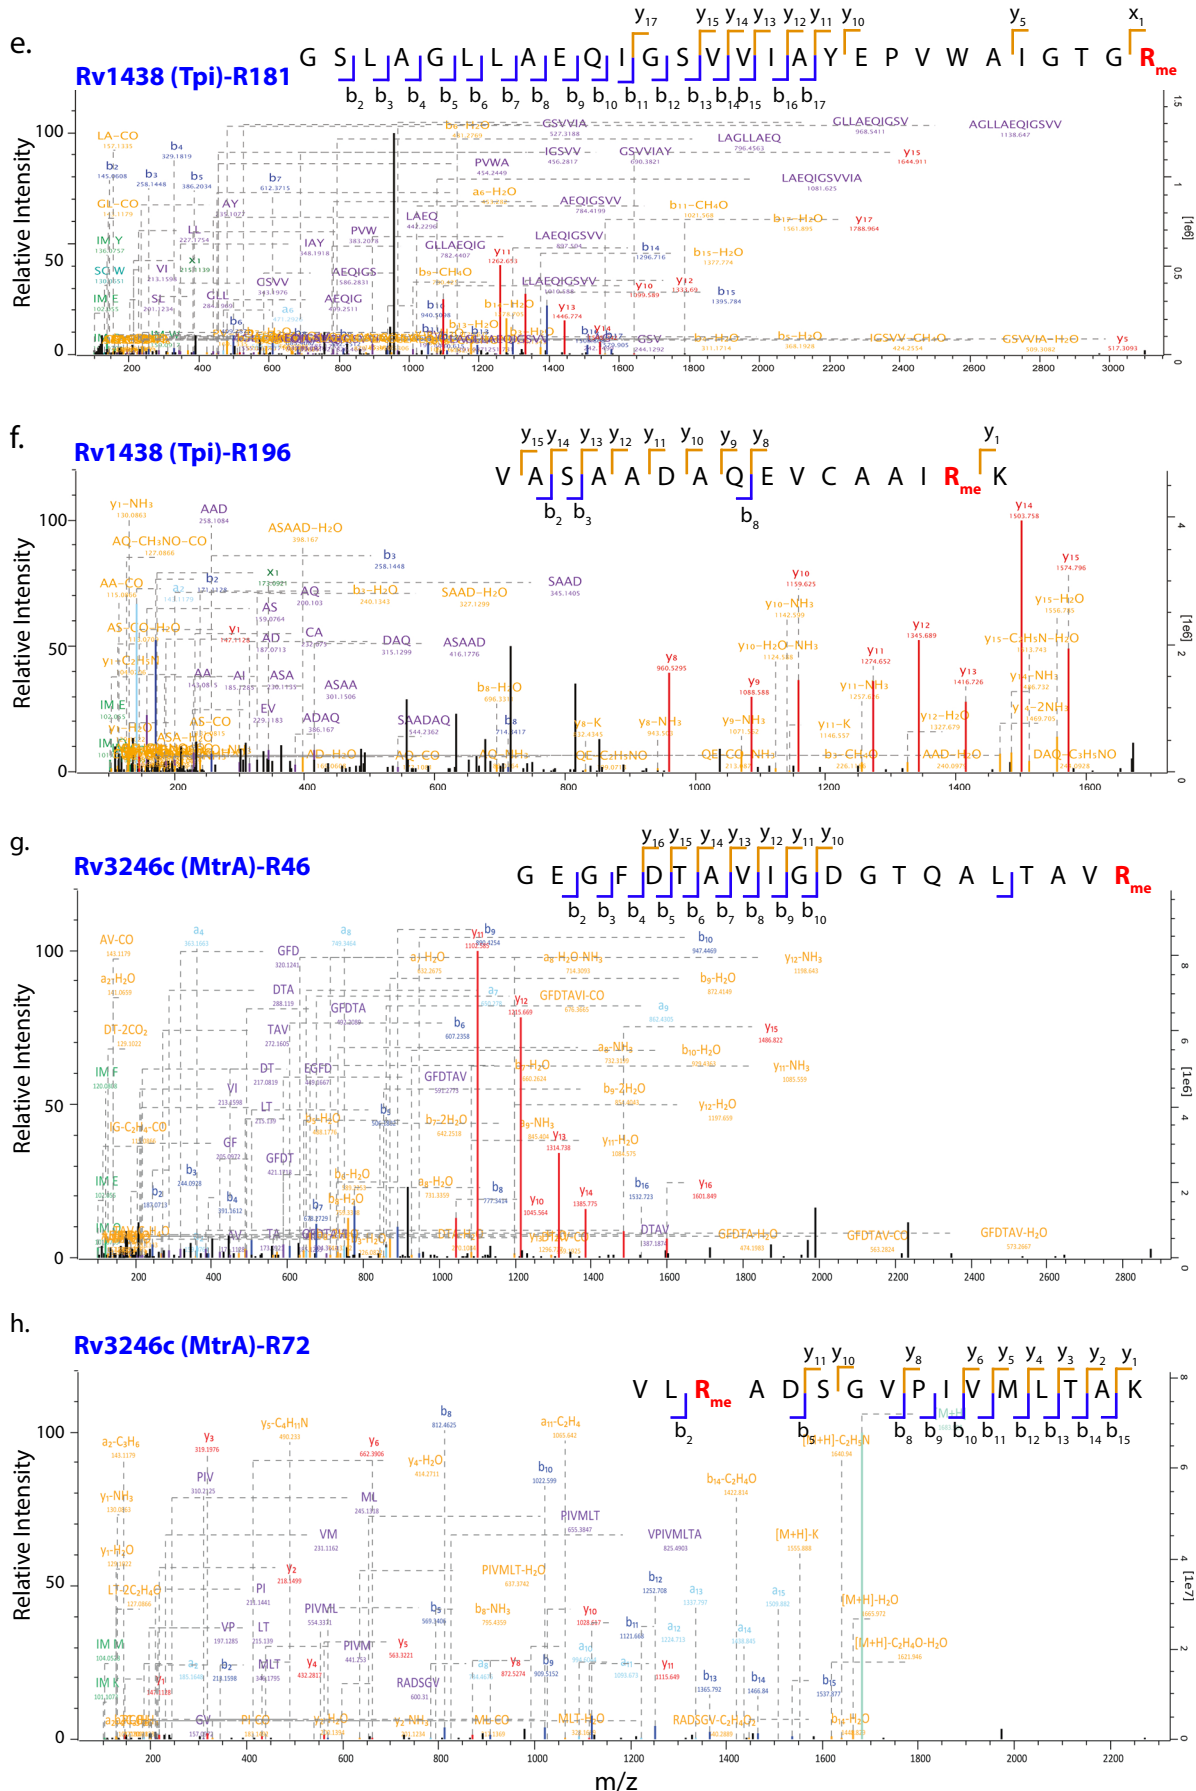

# Supplementary Figure 2i-2l

**i. Rv3246c (MtrA)-R122**

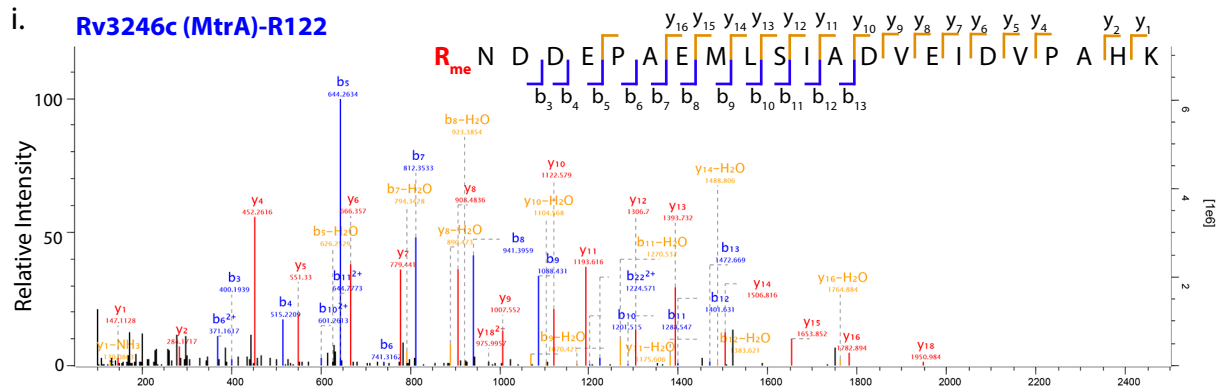

**j. Rv3246c (MtrA)-R167**

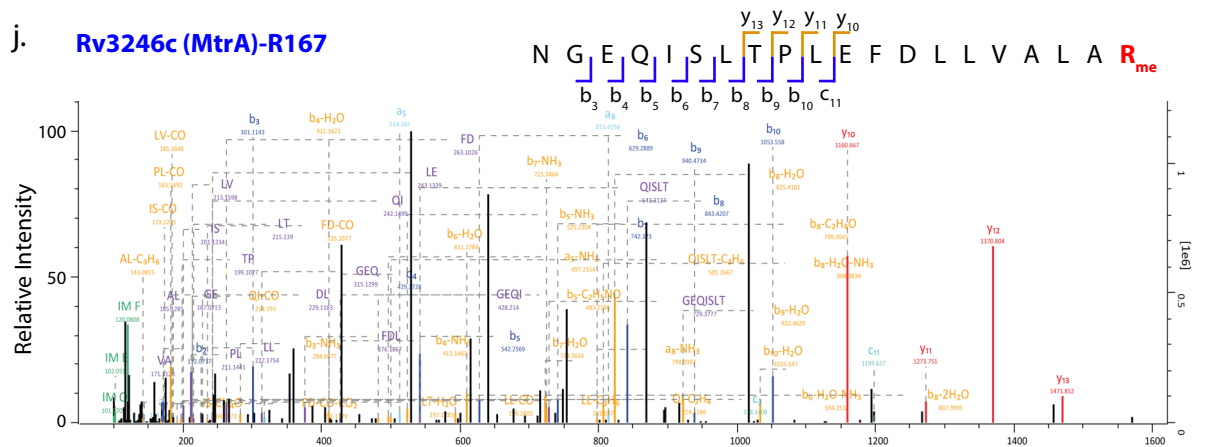

**k. Rv3246c (MtrA)-R200**

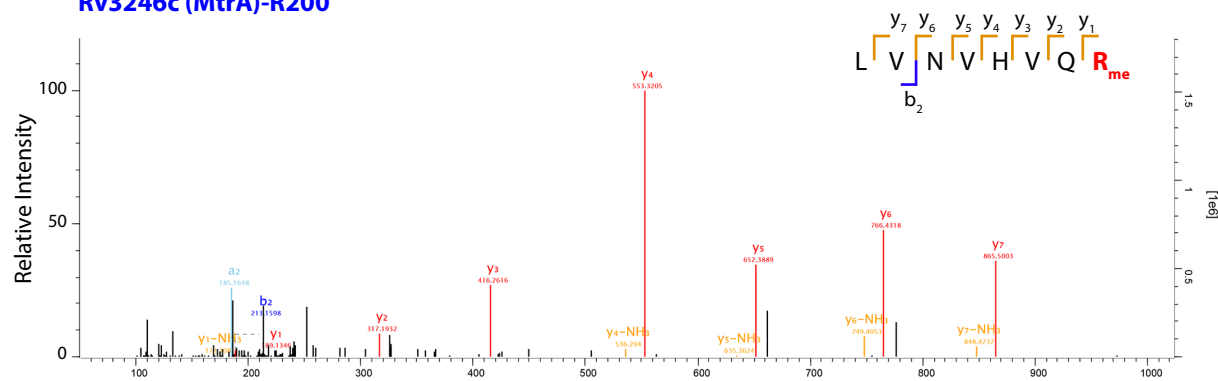

**l. Rv3246c (MtrA)-R219**

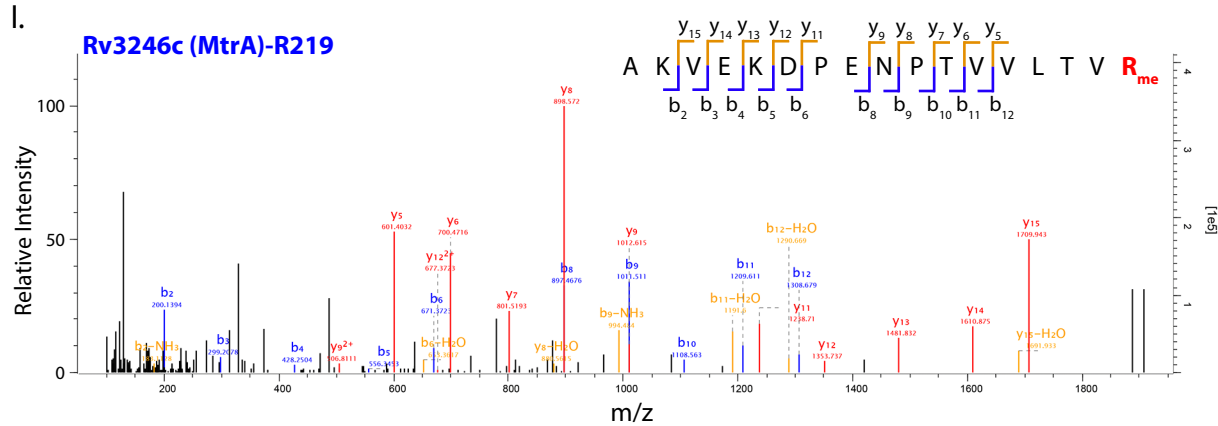

Supplementary Figure 2m-2p

m.

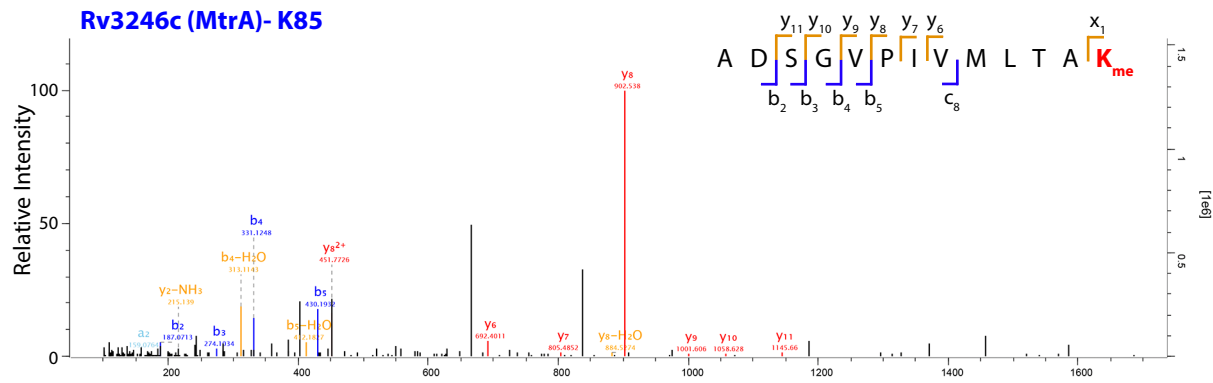

n.

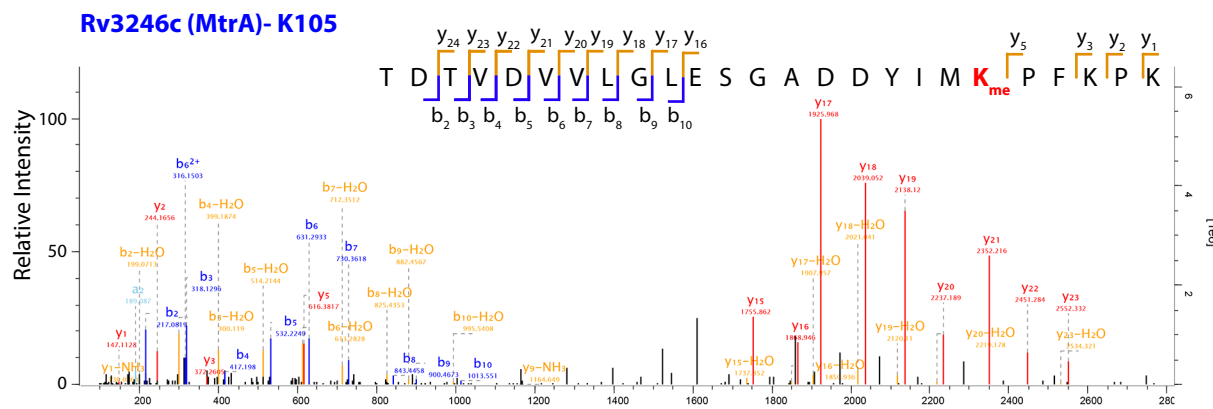

o.

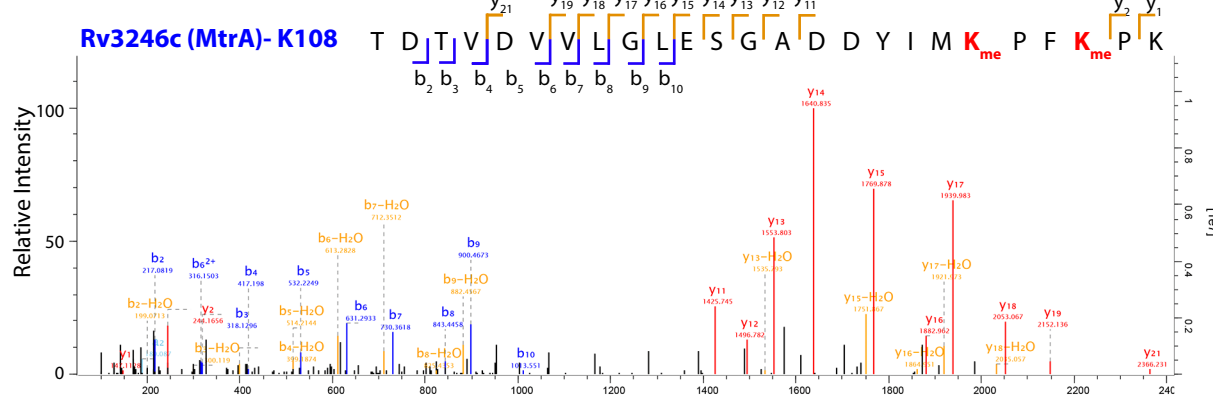

p.

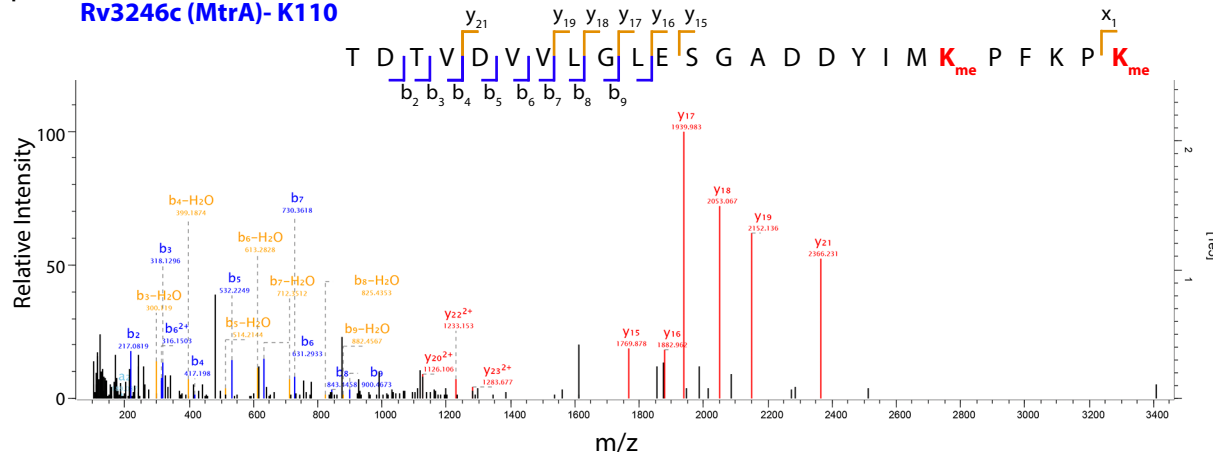



Supplementary Figure 2u-2x

u.

**Rv3846 (SodA)-K38**

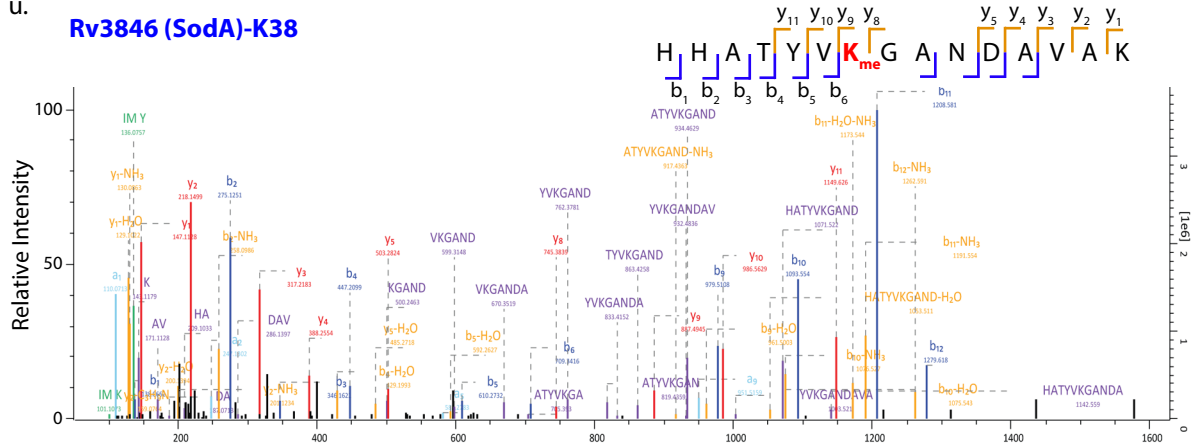

v.

**Rv3846 (SodA)-K46**

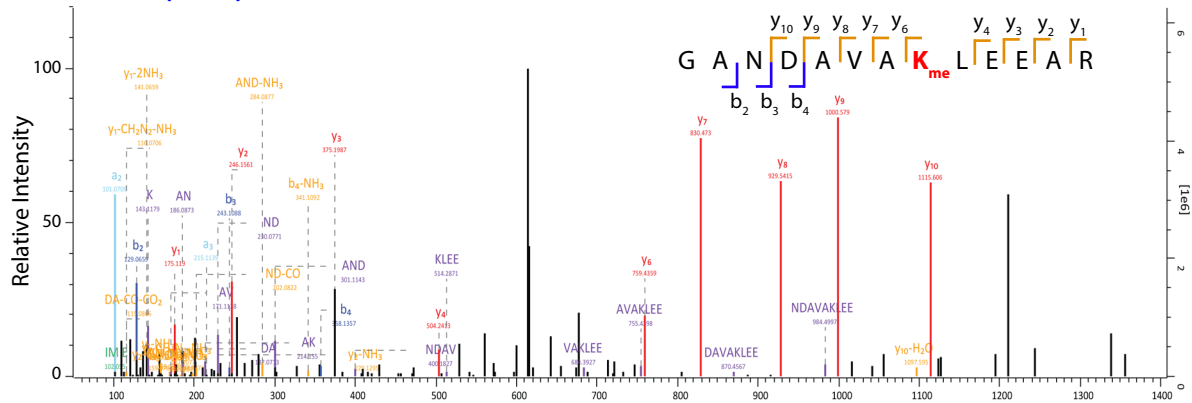

w.

**Rv3846 (SodA)-K53**

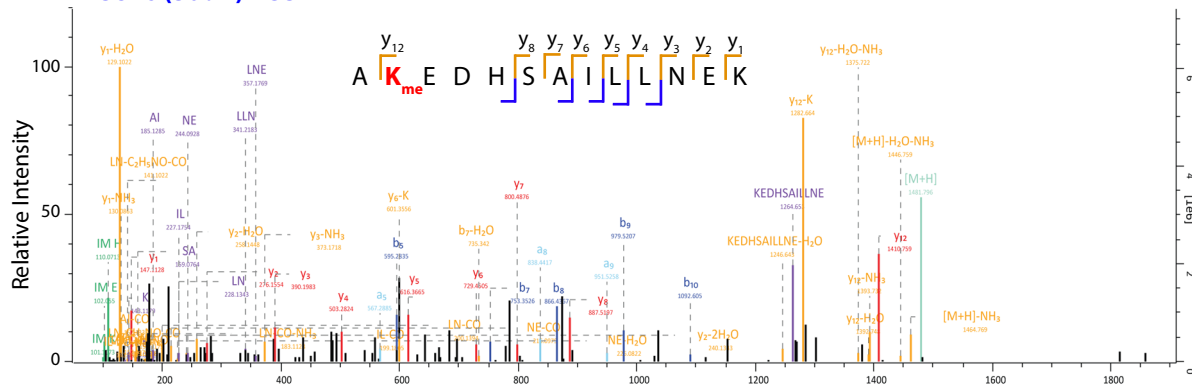

x.

**Rv3846 (SodA)-K81**

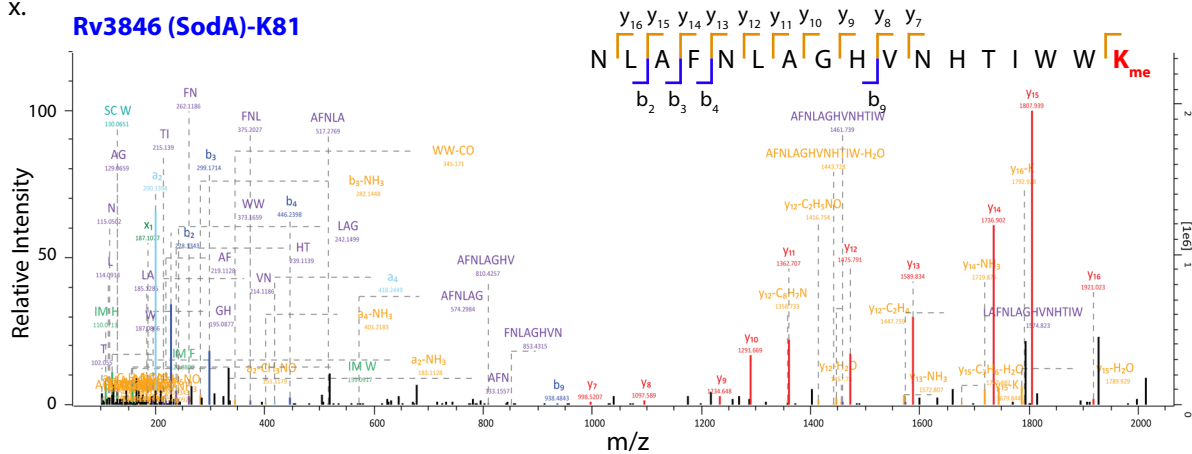



Supplementary Figure 2y-2ab

y.

**Rv3846 (SodA)-K179**

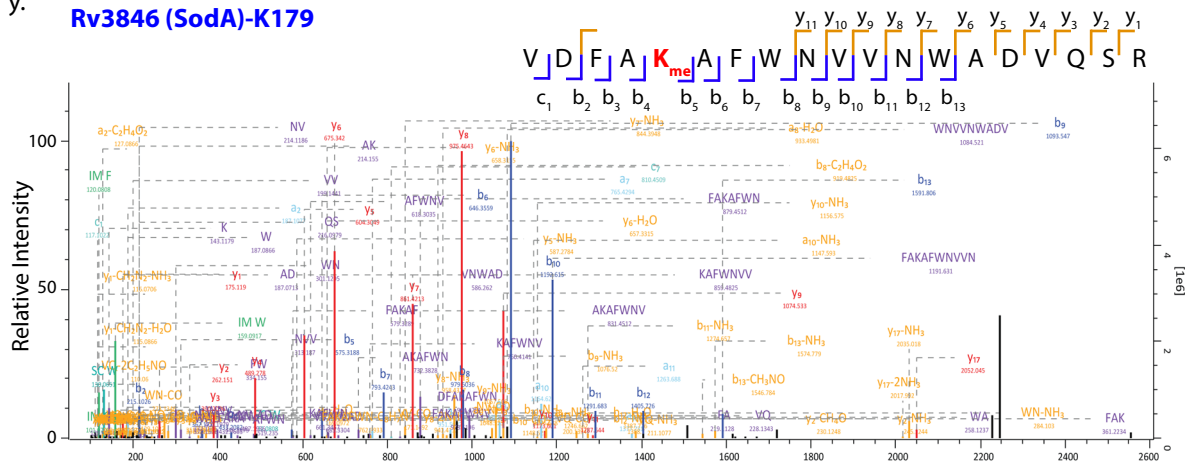

z.

**Rv289c (Ef-Ts)-R150**

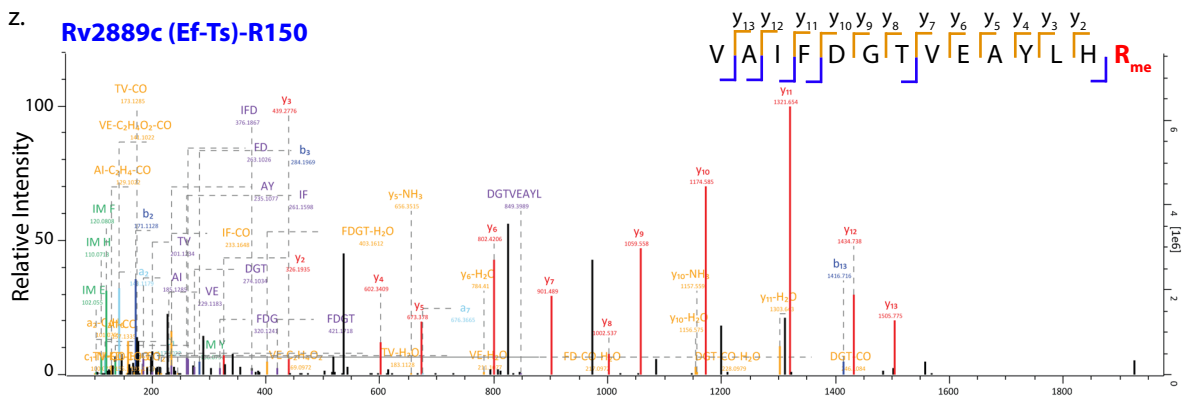

aa.

**Rv289c (Ef-Ts)-R151**

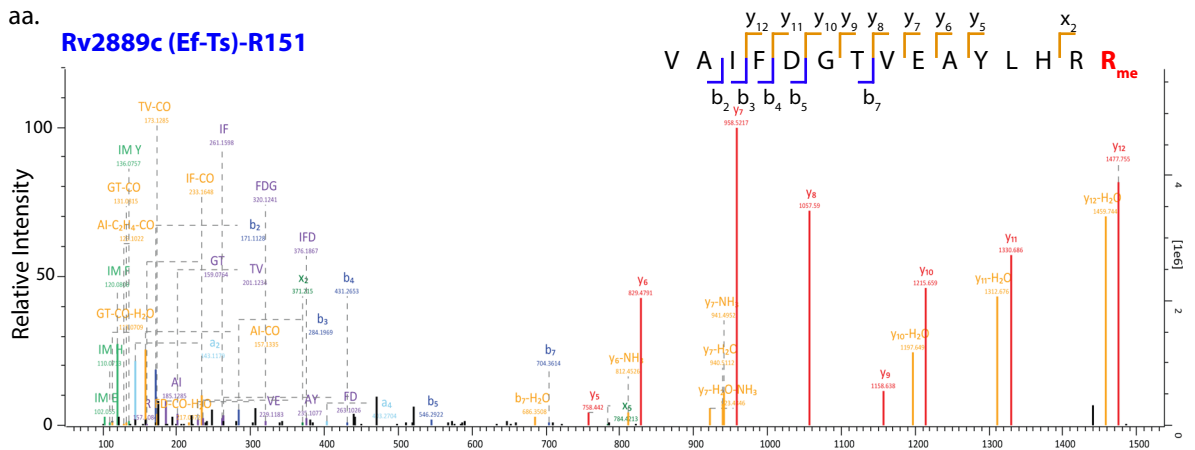

ab.

**Rv289c (Ef-Ts)-R262**

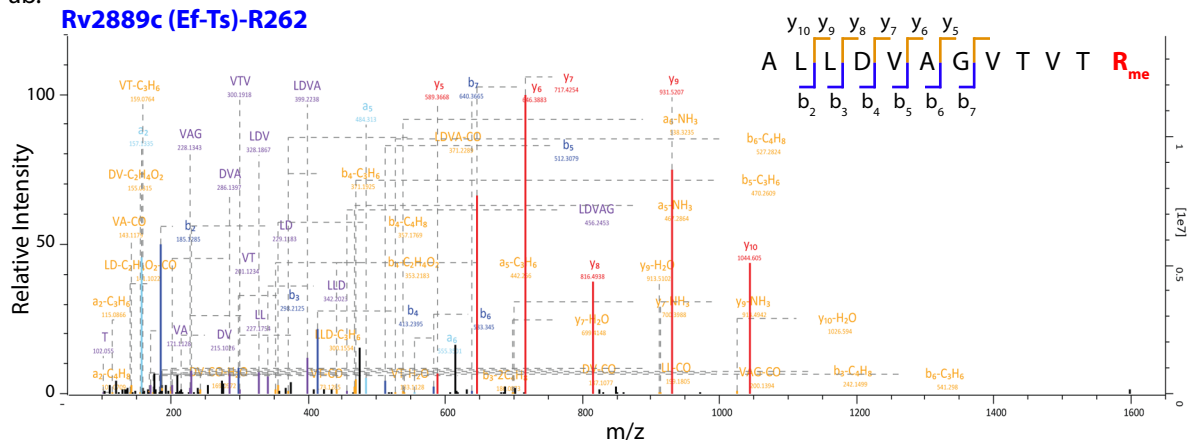

Supplementary Figure 2ac-2af

ac.

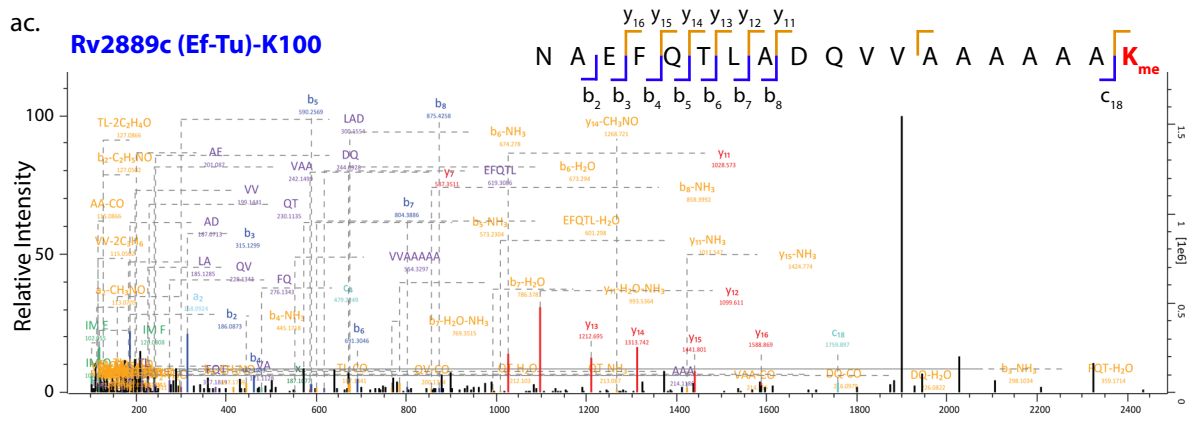

ad.

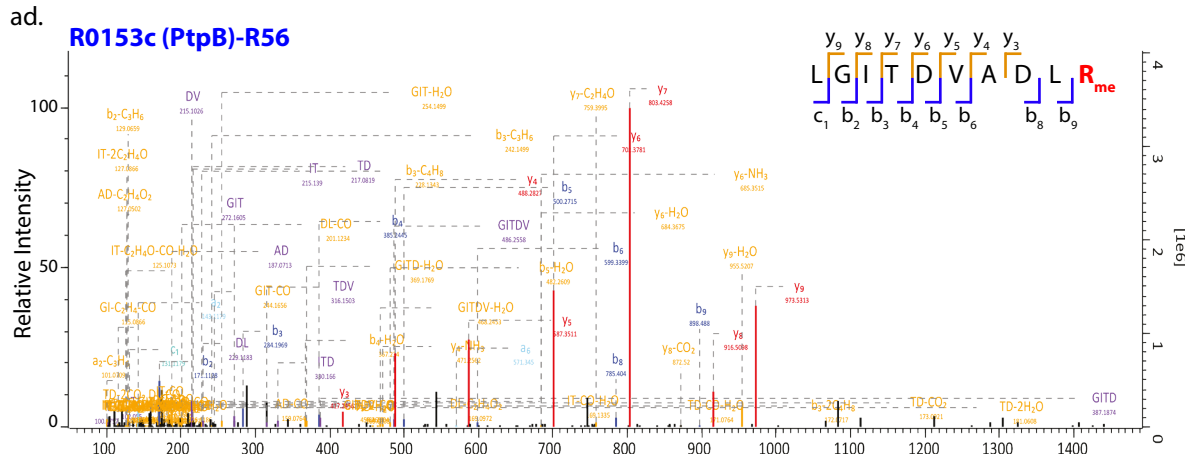

ae.

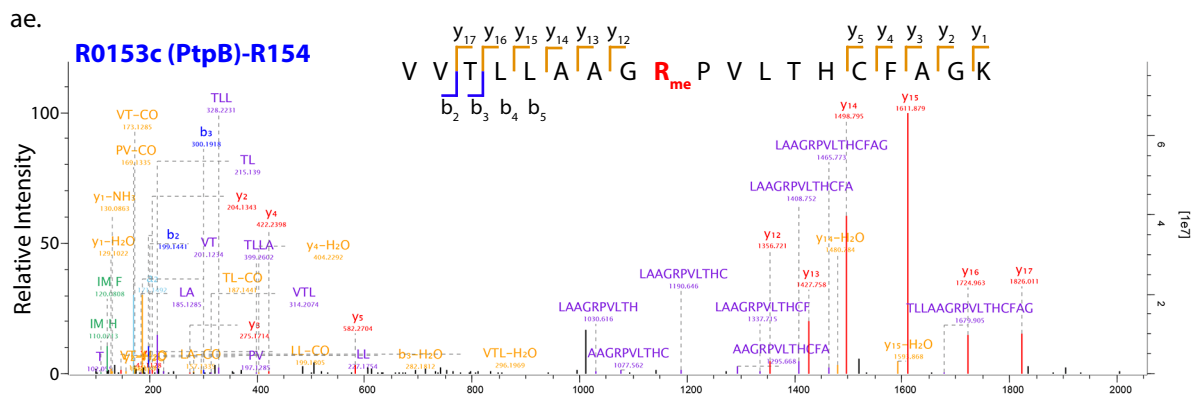

af.

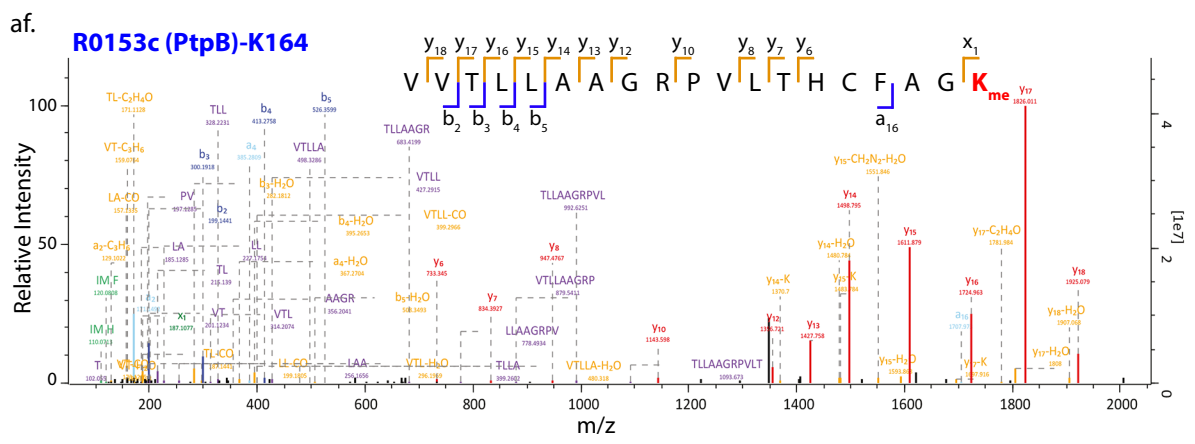

Supplementary Figure 2ag-2aj

ag.

**R2703 (SigA)-K15**

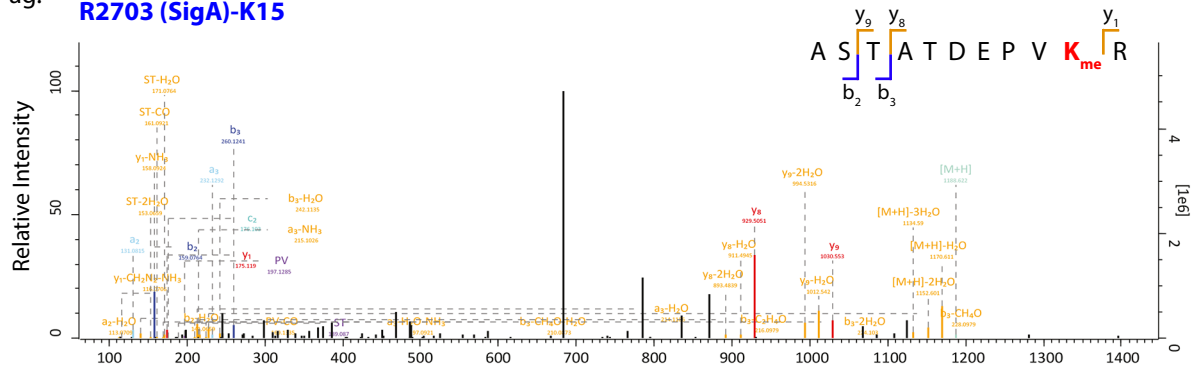

ah.

**Rv3248c (SahH)-R448**

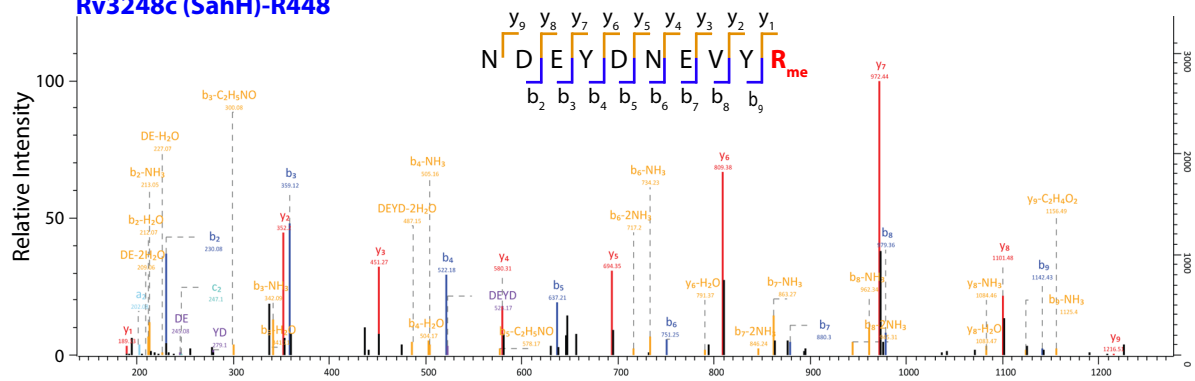

ai.

**Rv3248c (SahH)-K8**

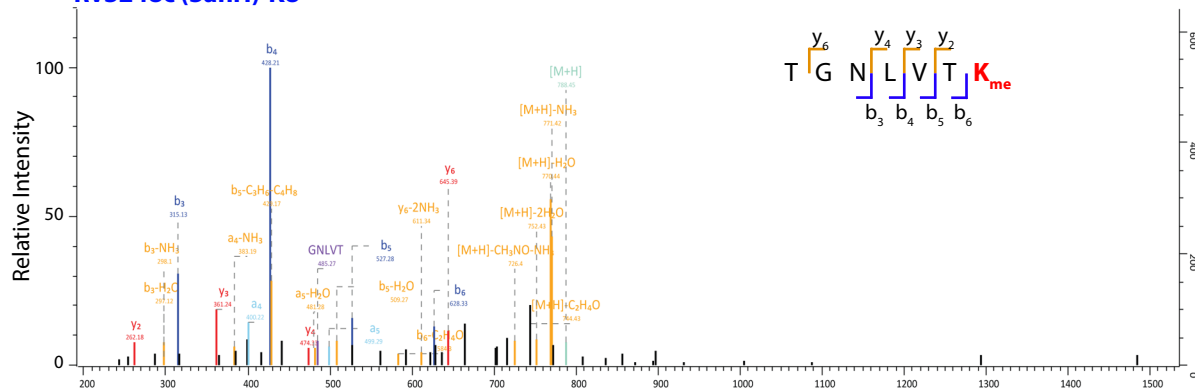

aj.

**Rv3248c (SahH)-K276**

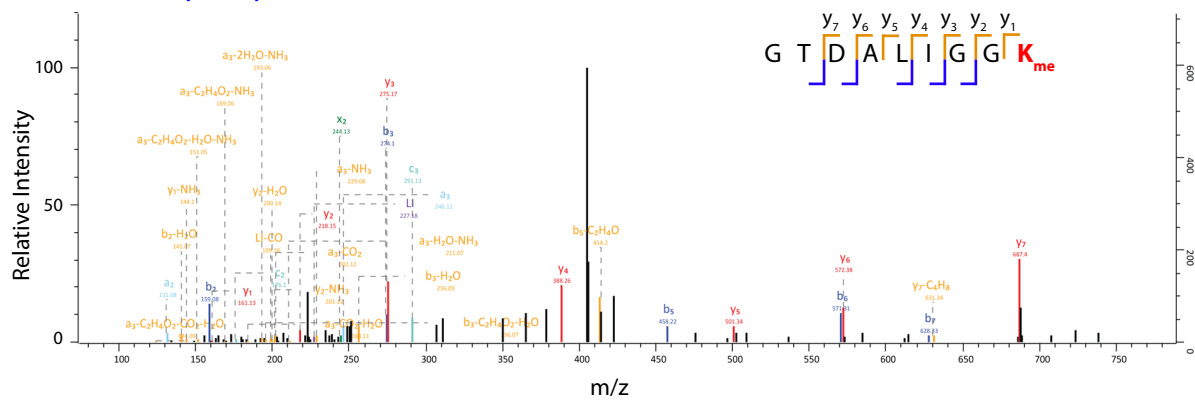

# Supplementary Figure 2ak-2al

ak.

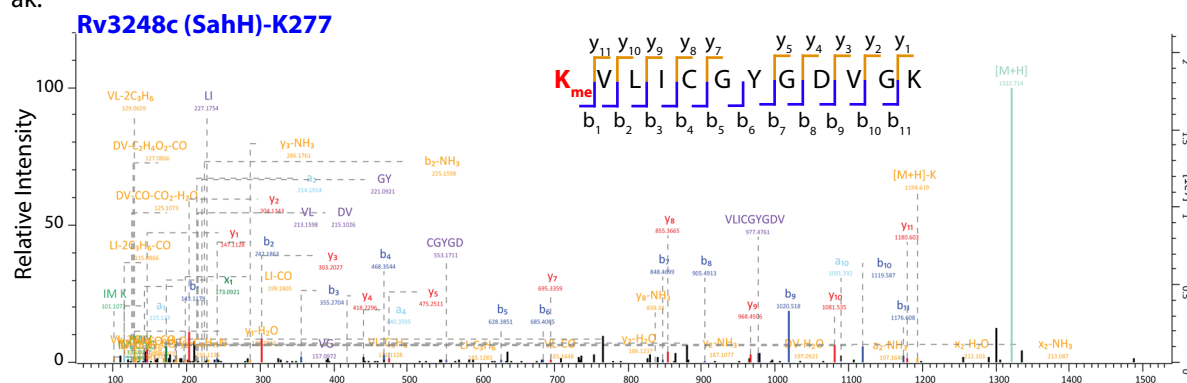

al.

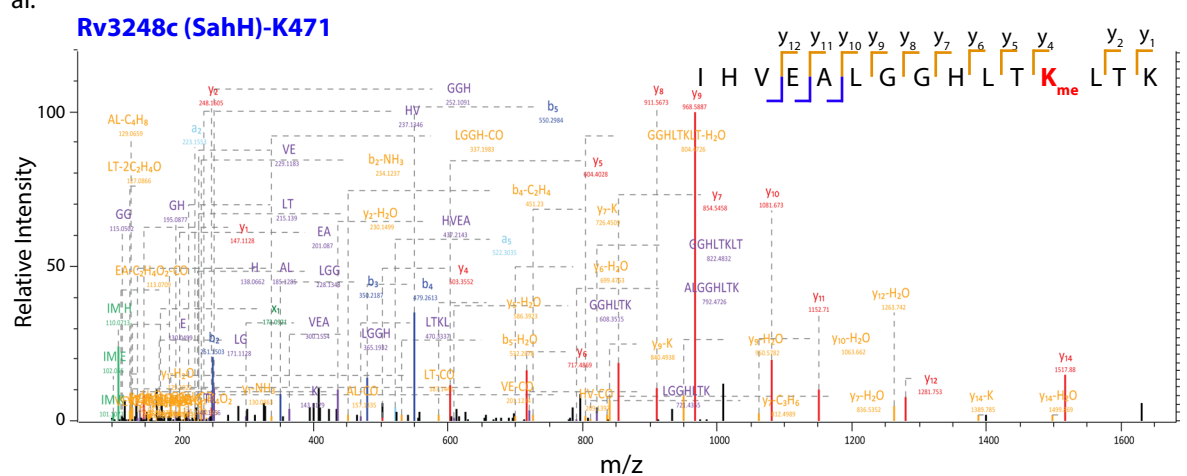

**Figure S2: Mass spectra of methylated peptides.** *Mtb* proteins purified from *Msm* were subjected to mass spectrometry for the identification of methylation sites. **(2a)** Mass spectrum of Mpt70 (*rv2875*). **(2b)** Mass spectrum of LldD2 (*rv1872c*). **(2c-2f)** Mass spectrum of Tpi (*rv1438*). **(2g-2I) & (2m-2S)** Mass spectrum of MtrA (*rv3246c*). **(2t-2y)** Mass spectrum of SodA (*rv3846*). **(2z-2ac)** Mass spectrum of Ef-Ts (*rv2889c*). **(2ad-2af)** Mass spectrum of PtpB (*rv0153c*). **(2ag)** Mass spectrum of SigA (*rv2703*). **(2ah-2al)** Mass spectrum of SahH (*rv3248c*). Each spectrum represents different methylation site at arginine or lysine residue.

Supplementary Figure 3

**OmpR** -MQENYKILVVDDDMRLRALLERYLTEQGFQVRSVANAEQMDRLLTRESFHLMVLDLMLP  
**MtrA** MDTMRQRILVVDDDDASLAEMLTIVLRGEGFDTAVIGDGTQALTAVRELRPDLVLLDLMLP  
.:\*\*\*\*\* \* :\* \* :\*\*:. :.. \* : . .\*:\*\*\*\*\*

**OmpR** GEDGLSICRRLRSQSNPMPIIMVTAKGEEVDRIVGLEIGADDYIPKPFNPPELLARIRAV  
**MtrA** GMNGIDVCRVLRADS-GVPIVMLTAKTDTVDVVLGLES GADDYIMKPFKPKELVARVRAR  
\* :\*:.:\*\* \*\*:\* :\*\*:\*:\*\* : \*\* :\*\*\* \*\*\*\*\* \*\*:\*:\*\*:\*\*\*\*

**OmpR** LRRQANELPGAPSQEEAVIAFGKFKLNLGTREMFREDEPMPLTSGEFAVLKALVSHPREP  
**MtrA** LRRNDDEPAE-----MLSIADVEIDVPAHKVTRNGEQISLTPLEFDLLVALARKPRQV  
\*\*\*: :\* :.....: : : \*.\* : \*\* \*\* :\* \*\* . :\*\*:

**OmpR** LSRDKLMNLRGREYSAMERSIDVQISRLRRMVEEDPAHPRYIQTVWGLGYVFPDGSKA  
**MtrA** FTRDVLLEQVWGYRHPADTRLVNVHVQRLRAKVEKDPENPTVVLTVRGVGYKAGPP----  
:\*\* \* : . \* .: \* \* :\*\*:.\*\*\* \*\*:\*\* :\* : \*\* \*:\*\* \*

**Figure S3: Sequence alignment of *E. coli* OmpR and *Mtb* MtrA.** Three key MtrA methylated residues studied here are marked in red and DNA recognition helix is underlined.

Supplementary Figure 4

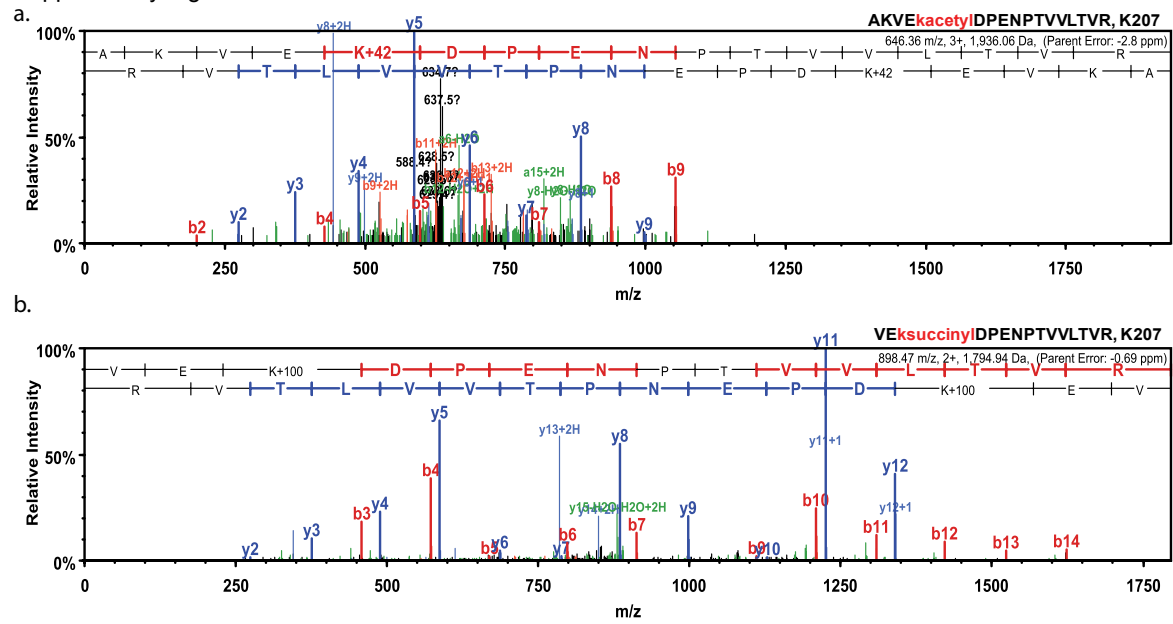



**Figure S4: Mass spectra of acetylated and succinylated peptides.** *Mtb* MtrA purified from *Msm* was subjected to mass-spectrometry for the identification of **(a)** acetylation and **(b)** succinylation sites; and the peptide spectra are shown.

**Table S1:** Details of 180 candidate protein-coding genes. Cells in green color shows methylated proteins identified in the study. Cell in light pink color shows the protein for which methylation was not detected by mass spectrometer. Cells in indigo color represents proteins that were purified but not detected as methylated by western blot.

**Table S2:** Methylation sites identified by mass spectrometry.

**Table S3:** The table shows mass spectrometric signal defined by the type of identification- either by “MS/MS” or by “match between run event (matching)”. The fold change in signal intensities are shown relative to those in MtrA.

| <b>Table S1: List of the selected proteins.</b>                                                                                               |                                                   |                                         |                |             |                                                                                                  |                                                                                     |                                                                                                                                                                                 |
|-----------------------------------------------------------------------------------------------------------------------------------------------|---------------------------------------------------|-----------------------------------------|----------------|-------------|--------------------------------------------------------------------------------------------------|-------------------------------------------------------------------------------------|---------------------------------------------------------------------------------------------------------------------------------------------------------------------------------|
| *Y (Essential for <i>in vitro</i> growth); C (Essential during growth on cholesterol); I (Essential during infection); and N (Non-essential). |                                                   |                                         |                |             |                                                                                                  |                                                                                     |                                                                                                                                                                                 |
| **Purification status is shown by Y (Yes) or N (No).                                                                                          |                                                   |                                         |                |             |                                                                                                  |                                                                                     |                                                                                                                                                                                 |
| Gene name                                                                                                                                     | Protein name                                      | Functional category                     | Essentiality * | Purified ** | GO Molecular Function                                                                            | GO Cellular compartment                                                             | GO Biological Process                                                                                                                                                           |
| Rv0153c                                                                                                                                       | Phosphotyrosine protein phosphatase PTPB (PTPase) | Regulatory proteins                     | C              | Y           | protein tyrosine phosphatase activity                                                            | cytoplasm                                                                           |                                                                                                                                                                                 |
| Rv1438                                                                                                                                        | Triosephosphate isomerase (TIM) (TPI)             | Intermediate metabolism and respiration | Y              | Y           | triose-phosphate isomerase activity                                                              | cytosol; extracellular region; plasma membrane                                      | gluconeogenesis; glyceraldehyde-3-phosphate biosynthetic process; glycerol catabolic process; glycolytic process; growth; pentose-phosphate shunt                               |
| Rv1872c                                                                                                                                       | Putative L-lactate dehydrogenase, LldD2           | Intermediate metabolism and respiration | N              | Y           | FMN binding; oxidoreductase activity                                                             | cell wall; plasma membrane                                                          |                                                                                                                                                                                 |
| Rv2703                                                                                                                                        | RNA polymerase sigma factor SigA (Sigma-A)        | Information pathways                    | Y              | Y           | DNA binding; sigma factor activity; transcription factor activity, sequence-specific DNA binding | cell wall; cytoplasm; plasma membrane                                               | growth; pathogenesis; response to water; transcription initiation from bacterial-type RNA polymerase promoter                                                                   |
| Rv2875                                                                                                                                        | Immunogenic protein Mpt70                         | Cell wall and cell processes            | N              | Y           |                                                                                                  | extracellular region; extracellular space; outer membrane-bounded periplasmic space |                                                                                                                                                                                 |
| Rv2889c                                                                                                                                       | Elongation factor Ts (EF-Ts)                      | Information pathways                    | Y              | Y           | translation elongation factor activity                                                           | cell wall; cytosol; plasma membrane                                                 | growth                                                                                                                                                                          |
| Rv3246c                                                                                                                                       | DNA-binding response regulator MtrA               | Regulatory proteins                     | I              | Y           | DNA binding; metal ion binding                                                                   | cytoplasm; plasma membrane                                                          | growth of symbiont in host; phosphorelay signal transduction system; positive regulation of transcription, DNA-templated; protein phosphorylation; transcription, DNA-templated |
| Rv3248c                                                                                                                                       | S-adenosyl-L-homocysteine                         | Intermediate                            | Y              | Y           | adenosylhomocysteine activity; NAD+                                                              | cell wall; cytosol; extracellular region;                                           | adenosine metabolic process; adhesion of symbiont to host cell; entry of bacterium into                                                                                         |

|         |                                                                                                                                                                                       |                                         |   |   |                                                                                                                                                                |                                                                   |                                                                                                                       |
|---------|---------------------------------------------------------------------------------------------------------------------------------------------------------------------------------------|-----------------------------------------|---|---|----------------------------------------------------------------------------------------------------------------------------------------------------------------|-------------------------------------------------------------------|-----------------------------------------------------------------------------------------------------------------------|
|         | (AdoHcyase)                                                                                                                                                                           | and respiration                         |   |   |                                                                                                                                                                |                                                                   | one-carbon metabolic process; S-adenosylhomocysteine catabolic process; S-adenosylmethionine cycle                    |
| Rv3846  | Superoxide dismutase [Fe], SodA                                                                                                                                                       | Virulence, detoxification, adaptation   | Y | Y | iron ion binding; superoxide dismutase activity                                                                                                                | cytosol; extracellular region; periplasmic space; plasma membrane | evasion or tolerance by symbiont of host-produced reactive oxygen species; pathogenesis; response to oxidative stress |
| Rv0694  | Possible L-lactate dehydrogenase (cytochrome) LldD1                                                                                                                                   | Intermediate metabolism and respiration | C | Y | FMN binding; oxidoreductase activity                                                                                                                           | plasma membrane                                                   |                                                                                                                       |
| Rv0009  | Peptidyl-prolyl cis-trans isomerase A (PPIase A) (Cyclophilin) (Rotamase A)                                                                                                           | Information pathways                    | C | Y | peptidyl-prolyl cis-trans isomerase activity                                                                                                                   | cell wall; cytosol; extracellular region; plasma membrane         | protein folding; response to iron ion                                                                                 |
| Rv0053  | 30S ribosomal protein S6, Rpsf                                                                                                                                                        | Information pathways                    | Y | Y | small ribosomal subunit rRNA binding; structural constituent of ribosome                                                                                       | cell wall; cytosolic small ribosomal subunit; plasma membrane     | translation                                                                                                           |
| Rv0089  | Uncharacterized methyltransferase Rv0089                                                                                                                                              | Intermediate metabolism and respiration | N | Y | S-adenosylmethionine-dependent methyltransferase activity                                                                                                      | cell wall; cytoplasm                                              | methylation                                                                                                           |
| Rv0129c | Diacylglycerol acyltransferase/mycolytransferase Ag85C (DGAT) (Acyl-CoA:diacylglycerol acyltransferase) (Antigen 85 complex C) (85C) (Ag85C) (Fibronectin-binding protein C) (Fbps C) | Lipid metabolism                        | N | Y | diacylglycerol O-acyltransferase activity; transferase activity, transferring acyl groups other than amino-acyl groups; trehalose O-mycolytransferase activity | cell wall; extracellular region                                   | glycolipid biosynthetic process; lipid transport; mycolate cell wall layer assembly; response to antibiotic           |
| Rv0166  | Deoxyrib...                                                                                                                                                                           | Regulatory                              | N | Y | DNA binding                                                                                                                                                    |                                                                   |                                                                                                                       |

|          |                                                                                   |                                         |   |   |                                                                                                                                                                             |                                                            |                                                                                                                                                                                                                                                                                                                                                                                                                                  |
|----------|-----------------------------------------------------------------------------------|-----------------------------------------|---|---|-----------------------------------------------------------------------------------------------------------------------------------------------------------------------------|------------------------------------------------------------|----------------------------------------------------------------------------------------------------------------------------------------------------------------------------------------------------------------------------------------------------------------------------------------------------------------------------------------------------------------------------------------------------------------------------------|
| 5c       | transcriptional regulatory protein Mce1R (Probably GntR-family)                   | proteins                                |   |   | transcription factor activity, sequence-specific DNA binding                                                                                                                |                                                            | immune response; negative regulation of symbiont transcription in response to host; transcription, DNA-templated                                                                                                                                                                                                                                                                                                                 |
| Rv035 1  | Protein GrpE (HSP-70 cofactor)                                                    | Virulence, detoxification, adaptation   | Y | Y | adenyl-nucleotide exchange factor activity; unfolded protein binding                                                                                                        | cell wall; cytoplasm                                       | cellular response to starvation; growth; protein folding                                                                                                                                                                                                                                                                                                                                                                         |
| Rv035 2  | Chaperone protein DnaJ 1                                                          | Virulence, detoxification, adaptation   | N | Y | ATP binding; zinc ion binding                                                                                                                                               | cell wall; cytoplasm; plasma membrane                      | DNA replication; growth; protein folding; regulation of gene expression; response to heat                                                                                                                                                                                                                                                                                                                                        |
| Rv038 3c | Possible conserved secreted protein                                               | Cell wall and cell processes            | Y | Y |                                                                                                                                                                             | cell wall; integral component of membrane; plasma membrane | growth                                                                                                                                                                                                                                                                                                                                                                                                                           |
| Rv041 0c | Serine/threonine-protein kinase PknG                                              | Regulatory proteins                     | Y | Y | ATP binding; protein serine/threonine kinase activity                                                                                                                       | cytosol; plasma membrane                                   | avoidance of host defenses; glutamate catabolic process; glutamine catabolic process; growth; modulation by symbiont of host phagocytosis; modulation by symbiont of host signal transduction pathway; negative regulation of cytolysis by symbiont of host cells; pathogenesis; positive regulation by symbiont of defense-related host reactive oxygen species production; protein autophosphorylation; response to antibiotic |
| Rv046 7  | Isocitrate lyase (ICL) (Isocitrase)                                               | Intermediary metabolism and respiration | Y | Y | isocitrate lyase activity; metal ion binding; methylisocitrate lyase activity; transferase activity, transferring acyl groups, acyl groups converted into alkyl on transfer | cytosol; plasma membrane                                   | cellular response to hypoxia; glyoxylate cycle; isocitrate metabolic process; maintenance of symbiont tolerance to host environment; pathogenesis; response to acetate; response to acid chemical; response to fatty acid; response to host immune response; tricarboxylic acid cycle                                                                                                                                            |
| Rv047 0c | Cyclopropane mycolic acid synthase 3 (CMAS) (Cyclopropane-fatty-acyl-phospholipid | Lipid metabolism                        | I | Y | cyclopropane-fatty-acyl-phospholipid synthase activity                                                                                                                      |                                                            | active evasion of host immune response; modulation by symbiont of host innate immune response; mycolic acid biosynthetic process; pathogenesis; S-adenosylmethionine metabolic process                                                                                                                                                                                                                                           |

|         |                                                                                                                                                                                         |                     |   |   |                                                                                                                   |                                                                                      |                                                                                                                                                                                                                                                          |
|---------|-----------------------------------------------------------------------------------------------------------------------------------------------------------------------------------------|---------------------|---|---|-------------------------------------------------------------------------------------------------------------------|--------------------------------------------------------------------------------------|----------------------------------------------------------------------------------------------------------------------------------------------------------------------------------------------------------------------------------------------------------|
|         | synthase) (CFA synthase) (Mycolic acid methyltransferase) (MA-MT) (S-adenosylmethionine-dependent methyltransferase) (AdoMet-MT) (SAM-MT)                                               |                     |   |   |                                                                                                                   |                                                                                      |                                                                                                                                                                                                                                                          |
| Rv0490  | Sensor-like histidine kinase senX3                                                                                                                                                      | Regulatory proteins | I | Y | ATP binding; phosphorelay sensor kinase activity                                                                  | extracellular region; integral component of membrane; intracellular; plasma membrane | pathogenesis; peptidyl-histidine phosphorylation; protein autophosphorylation                                                                                                                                                                            |
| Rv0491  | Sensory transduction protein regX3                                                                                                                                                      | Regulatory proteins | N | Y | DNA binding                                                                                                       | intracellular                                                                        | pathogenesis; phosphorelay signal transduction system; regulation of fatty acid metabolic process; regulation of phosphate metabolic process; regulation of response to stress; regulation of transcription, DNA-templated; transcription, DNA-templated |
| Rv0600c | Sensor histidine kinase component HK1                                                                                                                                                   | Regulatory proteins | N | Y | ATP binding; phosphorelay response regulator activity; protein histidine kinase activity; protein kinase activity | intracellular                                                                        | negative regulation of phosphorelay signal transduction system                                                                                                                                                                                           |
| Rv0644c | Cyclopropane mycolic acid synthase MmaA2 (CMAS) (Cyclopropane-fatty-acyl-phospholipid synthase) (CFA synthase) (Mycolic acid methyltransferase) (MA-MT) (S-adenosylmethionine-dependent | Lipid metabolism    | N | Y | cyclopropane-fatty-acyl-phospholipid synthase activity; methyltransferase activity                                | cell wall; cytoplasm; plasma membrane                                                | mycolic acid biosynthetic process                                                                                                                                                                                                                        |

|         |                                                                                                                  |                                         |   |   |                                                                                |                                                             |                                                                                                                                                                                   |
|---------|------------------------------------------------------------------------------------------------------------------|-----------------------------------------|---|---|--------------------------------------------------------------------------------|-------------------------------------------------------------|-----------------------------------------------------------------------------------------------------------------------------------------------------------------------------------|
|         | methyltransferase)<br>(AdoMet-MT)<br>(SAM-MT)                                                                    |                                         |   |   |                                                                                |                                                             |                                                                                                                                                                                   |
| Rv0685  | Elongation factor Tu (EF-Tu)                                                                                     | Information pathways                    | Y | Y | GTPase activity; GTP binding; translation elongation factor activity           | cell wall; cytosol; plasma membrane                         | growth; response to hypoxia; response to iron ion; translational elongation                                                                                                       |
| Rv0703  | 50S ribosomal protein L23, RplW                                                                                  | Information pathways                    | Y | Y | nucleotide binding; rRNA binding; structural constituent of ribosome           | cytosol; cytosolic large ribosomal subunit; plasma membrane | growth; ribosomal large subunit assembly; translation                                                                                                                             |
| Rv0705  | 30S ribosomal protein S19, RpsS                                                                                  | Information pathways                    | Y | Y | rRNA binding; structural constituent of ribosome                               | cytosolic small ribosomal subunit; plasma membrane          | growth; ribosomal small subunit assembly; translation                                                                                                                             |
| Rv0706  | 50S ribosomal protein L22, RplV                                                                                  | Information pathways                    | Y | Y | rRNA binding; structural constituent of ribosome                               | cell wall; cytosolic large ribosomal subunit                | growth; translation                                                                                                                                                               |
| Rv0733  | Adenylate kinase (AK) (ATP-AMP transphosphorylase) (ATP:AMP phosphotransferase) (Adenylate monophosphate kinase) | Intermediate metabolism and respiration | N | Y | adenylate kinase activity; ATP binding; nucleoside diphosphate kinase activity | cell wall; cytosol; plasma membrane                         | AMP salvage; nucleoside diphosphate metabolic process; nucleoside monophosphate metabolic process; nucleoside triphosphate metabolic process; purine nucleobase metabolic process |
| Rv0758  | ATP-binding protein (Possible two component system response sensor kinase membrane associated PhoR)              | Regulatory proteins                     | N | Y | ATP binding; phosphorelay sensor kinase activity                               | integral component of membrane; intracellular               |                                                                                                                                                                                   |
| Rv0814c | Uncharacterized protein Rv0814c, SseC2                                                                           | Intermediate metabolism and respiration | N | Y |                                                                                | cell wall; plasma membrane                                  |                                                                                                                                                                                   |
| Rv0844c | Probable transcriptional regulatory protein                                                                      | Regulatory proteins                     | N | Y | DNA binding                                                                    |                                                             | phosphorelay signal transduction system; regulation of transcription, DNA-templated;                                                                                              |

|             |                                                                               |                                         |   |   |                                                                                                                                                                                                                          |                                                                                                  |                                                                                                                                                                                                                                               |
|-------------|-------------------------------------------------------------------------------|-----------------------------------------|---|---|--------------------------------------------------------------------------------------------------------------------------------------------------------------------------------------------------------------------------|--------------------------------------------------------------------------------------------------|-----------------------------------------------------------------------------------------------------------------------------------------------------------------------------------------------------------------------------------------------|
| Rv086<br>7c | Resuscitation-promoting factor RpfA                                           | Cell wall and cell processes            | N | Y | hydrolase activity                                                                                                                                                                                                       | extracellular region                                                                             | negative regulation of gene expression; pathogenesis; positive regulation of growth rate                                                                                                                                                      |
| Rv093<br>1c | Serine/threonine-protein kinase PknD                                          | Regulatory proteins                     | N | Y | ATP binding; manganese ion binding; protein kinase activity; protein serine/threonine kinase activity                                                                                                                    | cell wall; cytosol; extracellular region; integral component of plasma membrane; plasma membrane | cellular response to phosphate starvation; negative regulation of catalytic activity; negative regulation of fatty acid biosynthetic process; negative regulation of protein binding; pathogenesis; positive regulation of catalytic activity |
| Rv101<br>5c | 50S ribosomal protein L25 (General stress protein CTC), RplY                  | Information pathways                    | Y | Y | 5S rRNA binding; structural constituent of ribosome                                                                                                                                                                      | cytosol; ribosome                                                                                | translation                                                                                                                                                                                                                                   |
| Rv103<br>3c | Transcriptional regulator (Two component transcriptional regulator TrcR)      | Regulatory proteins                     | N | Y | DNA binding                                                                                                                                                                                                              | intracellular                                                                                    | phosphorelay signal transduction system; regulation of transcription, DNA-templated; transcription, DNA-templated                                                                                                                             |
| Rv107<br>9  | Cystathionine gamma-synthase (CGS) (O-succinylhomoserine (thiol)-lyase), MetB | Intermediate metabolism and respiration | I | Y | cystathionine gamma-lyase activity; cystathionine gamma-synthase activity; pyridoxal phosphate binding                                                                                                                   | cytoplasm; cytosol; plasma membrane                                                              | cysteine biosynthetic process via cystathionine; L-methionine biosynthetic process from L-homoserine via cystathionine; sulfur amino acid metabolic process; transsulfuration                                                                 |
| Rv115<br>1c | NAD-dependent protein deacylase (Regulatory protein SIR2 homolog)             | Regulatory proteins                     | N | Y | NAD+ binding; NAD+ nucleosidase activity; NAD-dependent protein deacetylase activity; protein-malonyllysine demalonylase activity; protein-succinyllysine desuccinylase activity; transferase activity; zinc ion binding | cell wall; cytoplasm                                                                             | DNA repair; protein auto-ADP-ribosylation; protein deacetylation                                                                                                                                                                              |
| Rv122<br>1  | Alternative RNA polymerase sigma factor SigE                                  | Information pathways                    | N | Y | DNA binding; sigma factor activity; transcription factor activity, sequence-specific DNA binding                                                                                                                         | cytoplasm                                                                                        | DNA-templated transcription, initiation; growth of symbiont in host cell; pathogenesis; regulation of chaperone-mediated protein complex assembly; response to heat; response to heat immune response; response to                            |



|         |                                                                                                           |                                         |   |   |                                                                                                       |                                                           |                                                                                                                                            |
|---------|-----------------------------------------------------------------------------------------------------------|-----------------------------------------|---|---|-------------------------------------------------------------------------------------------------------|-----------------------------------------------------------|--------------------------------------------------------------------------------------------------------------------------------------------|
|         |                                                                                                           |                                         |   |   |                                                                                                       |                                                           | hydrogen peroxide; response to xenobiotic stimulus                                                                                         |
| Rv1240  | Malate dehydrogenase, Mdh                                                                                 | Intermediary metabolism and respiration | N | Y | L-malate dehydrogenase activity                                                                       | cell wall; cytosol; plasma membrane                       | carbohydrate metabolic process; malate metabolic process; NADH metabolic process; oxaloacetate metabolic process; tricarboxylic acid cycle |
| Rv1267c | Transcriptional regulatory protein EmbR                                                                   | Regulatory proteins                     | N | Y | ATPase activity; DNA binding; GTPase activity                                                         | cell wall; intracellular; plasma membrane                 | phosphorelay signal transduction system; regulation of transcription, DNA-templated; transcription, DNA-templated                          |
| Rv1392  | S-adenosylmethionine synthase (AdoMet synthase) (MAT) (Methionine adenosyltransferase), MetK              | Intermediary metabolism and respiration | Y | Y | ATP binding; magnesium ion binding; methionine adenosyltransferase activity                           | cell wall; cytosol; plasma membrane                       | growth; one-carbon metabolic process; S-adenosylmethionine biosynthetic process                                                            |
| Rv1436  | Glyceraldehyde-3-phosphate dehydrogenase (GAPDH) (NAD-dependent glyceraldehyde-3-phosphate dehydrogenase) | Intermediary metabolism and respiration | Y | Y | glyceraldehyde-3-phosphate dehydrogenase (NAD+) (phosphorylating) activity; NAD binding; NADP binding | cell wall; cytosol; extracellular region; plasma membrane | glucose metabolic process; glycolytic process; growth                                                                                      |
| Rv1437  | Phosphoglycerate kinase, Pgk                                                                              | Intermediary metabolism and respiration | Y | Y | ATP binding; phosphoglycerate kinase activity                                                         | cytoplasm; extracellular region; plasma membrane          | glycolytic process; growth                                                                                                                 |
| Rv1617  | Pyruvate kinase (PK) PykA                                                                                 | Intermediary metabolism and respiration | Y | Y | ATP binding; kinase activity; magnesium ion binding; potassium ion binding; pyruvate kinase activity  | cytosol; plasma membrane                                  | growth                                                                                                                                     |
| Rv1626  | Probable transcriptional regulatory protein pdaR                                                          | Regulatory proteins                     | C | Y | RNA binding                                                                                           | cell wall; intracellular; plasma membrane                 | growth; phosphorelay signal transduction system; transcription, DNA-templated; transcription antitermination                               |

|         |                                                                                                                                                      |                                         |   |   |                                                                                                                 |                                                                      |                                                                                                                                                                                                 |
|---------|------------------------------------------------------------------------------------------------------------------------------------------------------|-----------------------------------------|---|---|-----------------------------------------------------------------------------------------------------------------|----------------------------------------------------------------------|-------------------------------------------------------------------------------------------------------------------------------------------------------------------------------------------------|
| 4       | (cytidine-2'-O)-methyltransferase TlyA (16S rRNA (cytidine1409-2'-O)-methyltransferase) (23S rRNA (cytidine1920-2'-O)-methyltransferase) (Hemolysin) | detoxification, adaptation              |   |   | methyltransferase activity                                                                                      | cytoplasm; extracellular region; host cell plasma membrane; membrane | pathogenesis; rRNA methylation                                                                                                                                                                  |
| Rv1747  | ABC transporter ATP-binding/permease protein Rv1747                                                                                                  | Cell wall and cell processes            | N | Y | ATPase activity, coupled to transmembrane movement of substances; ATP binding                                   | cell wall; cytosol; integral component of membrane; plasma membrane  |                                                                                                                                                                                                 |
| Rv1827  | Glycogen accumulation regulator GarA                                                                                                                 | Conserved hypotheticals                 | Y | Y | identical protein binding                                                                                       | cell wall; extracellular region; plasma membrane                     | negative regulation of glycolytic process; protein autophosphorylation; regulation of cellular respiration                                                                                      |
| Rv1932  | Probable thiol peroxidase, Tpx                                                                                                                       | Virulence, detoxification, adaptation   | N | Y | disulfide oxidoreductase activity; peroxidase activity; peroxiredoxin activity; thioredoxin peroxidase activity | cell wall; cytosol; extracellular region                             | cell redox homeostasis; evasion or tolerance by symbiont of host-produced nitric oxide; oxidation-reduction process; pathogenesis; response to nitrosative stress; response to oxidative stress |
| Rv1984c | Probable cutinase Rv1984c                                                                                                                            | Cell wall and cell processes            | N | Y | acylglycerol lipase activity; carboxylic ester hydrolase activity; short-chain carboxylesterase activity        | cell wall; extracellular region                                      | medium-chain fatty acid catabolic process; monoacylglycerol catabolic process; short-chain fatty acid catabolic process                                                                         |
| Rv2068c | Beta-lactamase (Ambler class A beta-lactamase)                                                                                                       | Intermediate metabolism and respiration | N | Y | beta-lactamase activity; cephalosporinase activity; penicillinase activity                                      | extracellular region; periplasmic space; plasma membrane             | beta-lactam antibiotic catabolic process; response to antibiotic                                                                                                                                |
| Rv2112c | Deamidase of Pup, Dop                                                                                                                                | Intermediate metabolism and             | N | Y | ATP binding; hydrolase activity, acting on carbon-nitrogen (but not peptide) bonds in                           |                                                                      | modification-dependent protein catabolic process; pathogenesis; proteasomal protein catabolic process; protein regulation                                                                       |

|         |                                                                                 |                                         |   |   |                                                                                                                                                                                                                    |                                                                                    |                                                                                                                                                                                                                                                                                    |
|---------|---------------------------------------------------------------------------------|-----------------------------------------|---|---|--------------------------------------------------------------------------------------------------------------------------------------------------------------------------------------------------------------------|------------------------------------------------------------------------------------|------------------------------------------------------------------------------------------------------------------------------------------------------------------------------------------------------------------------------------------------------------------------------------|
|         |                                                                                 | respiration                             |   |   | linear amides; metal ion binding; peptidase activity                                                                                                                                                               |                                                                                    |                                                                                                                                                                                                                                                                                    |
| Rv2234  | Probable low molecular weight protein-tyrosine-phosphatase (PTPase)             | Regulatory proteins                     | N | Y | protein tyrosine phosphatase activity                                                                                                                                                                              | extracellular region; host cell endosome; plasma membrane                          | modification by symbiont of host morphology or physiology via secreted substance; negative regulation by symbiont of host cell-mediated immune response; pathogenesis; protein dephosphorylation                                                                                   |
| Rv2244  | Meromycolate extension acyl carrier protein (ACP)                               | Lipid metabolism                        | Y | Y | ACP phosphopantetheine attachment site binding involved in fatty acid biosynthetic process; acyl binding                                                                                                           | cell wall; cytosol; plasma membrane                                                | acyl-CoA metabolic process; growth                                                                                                                                                                                                                                                 |
| Rv2445c | Nucleoside diphosphate kinase (NDK) (NDKA) (NDP kinase) (Nucleoside-2-P kinase) | Intermediary metabolism and respiration | N | Y | ATP binding; metal ion binding; nuclease activity; nucleoside diphosphate kinase activity                                                                                                                          | cytoplasm; extracellular region; host cell nucleus; intracellular; plasma membrane | CTP biosynthetic process; GTP biosynthetic process; nucleic acid phosphodiester bond hydrolysis; nucleoside triphosphate biosynthetic process; protein autophosphorylation; purine nucleotide metabolic process; pyrimidine nucleotide metabolic process; UTP biosynthetic process |
| Rv2582  | Probable peptidyl-prolyl cis-trans isomerase B (PPIase B) (Rotamase B)          | Information pathways                    | Y | Y | peptidyl-prolyl cis-trans isomerase activity                                                                                                                                                                       | integral component of plasma membrane; plasma membrane                             | growth; protein folding                                                                                                                                                                                                                                                            |
| Rv2611c | Phosphatidylinositol mannoside acyltransferase (PIM acyltransferase)            | Lipid metabolism                        | Y | Y | transferase activity, transferring acyl groups                                                                                                                                                                     | integral component of membrane; plasma membrane                                    | growth; phosphatidylinositol metabolic process                                                                                                                                                                                                                                     |
| Rv2711  | Iron-dependent repressor IdeR                                                   | Regulatory proteins                     | Y | Y | cadmium ion binding; cobalt ion binding; DNA binding; ferrous iron binding; iron ion binding; manganese ion binding; nickel cation binding; transcription factor activity, sequence-specific DNA binding; zinc ion | cell wall; cytoplasm; plasma membrane                                              | growth; negative regulation of transcription, DNA-templated; regulation of transcription, DNA-templated; response to oxidative stress; siderophore biosynthetic process from catechol; transcription, DNA-templated                                                                |

|         |                                                                                                            |                                       |   |   |                                                                                                                                     |                                                                                |                                                                                                                                                                                                              |
|---------|------------------------------------------------------------------------------------------------------------|---------------------------------------|---|---|-------------------------------------------------------------------------------------------------------------------------------------|--------------------------------------------------------------------------------|--------------------------------------------------------------------------------------------------------------------------------------------------------------------------------------------------------------|
|         |                                                                                                            |                                       |   |   | binding                                                                                                                             |                                                                                |                                                                                                                                                                                                              |
| Rv2956  | Conserved protein                                                                                          | Conserved hypotheticals               | N | Y | O-methyltransferase activity                                                                                                        |                                                                                |                                                                                                                                                                                                              |
| Rv3082c | HTH-type transcriptional regulator VirS (Virulence-regulating protein)                                     | Virulence, detoxification, adaptation | N | Y | core promoter proximal region sequence-specific DNA binding; transcription factor activity, sequence-specific DNA binding           | cytosol                                                                        | cellular response to acidic pH; pathogenesis; positive regulation of transcription, DNA-templated; transcription, DNA-templated                                                                              |
| Rv3143  | Uncharacterized response regulatory protein Rv3143                                                         | Regulatory proteins                   | N | Y |                                                                                                                                     | cell wall; intracellular                                                       | phosphorelay signal transduction system                                                                                                                                                                      |
| Rv3220c | Probable sensor histidine kinase pdtaS                                                                     | Regulatory proteins                   | N | Y | ATP binding; phosphorelay sensor kinase activity; protein kinase activity                                                           | intracellular                                                                  | phosphorelay signal transduction system; protein autophosphorylation                                                                                                                                         |
| Rv3249c | Possible transcriptional regulatory protein (Probably TetR-family)                                         | Regulatory proteins                   | N | Y | DNA binding                                                                                                                         |                                                                                | regulation of transcription, DNA-templated; transcription, DNA-templated                                                                                                                                     |
| Rv3366  | Putative tRNA (cytidine(34)-2'-O)-methyltransferase (tRNA (cytidine/uridine-2'-O)-methyltransferase), SpoU | Information pathways                  | N | Y | methyltransferase activity; RNA binding; S-adenosylmethionine-dependent methyltransferase activity; tRNA methyltransferase activity | cytoplasm                                                                      | wobble position cytosine ribose methylation; wobble position uridine ribose methylation                                                                                                                      |
| Rv3418c | 10 kDa chaperonin (10 kDa antigen) (BCG-A heat shock protein) (GroES protein) (Protein Cpn10)              | Virulence, detoxification, adaptation | Y | Y | ATP binding; chaperone binding; metal ion binding; unfolded protein binding                                                         | cell wall; cytosol; extracellular region; GroEL-GroES complex; plasma membrane | cellular response to heat; chaperone mediated protein folding requiring cofactor; growth; regulation of transcription, DNA-templated; response to antibiotic; response to heat; response to unfolded protein |

|         |                                                                                                                                                               |                              |   |   |                                                                                                                                                                                                                      |                                                                                                                                               |                                                                                                                                                                                                          |
|---------|---------------------------------------------------------------------------------------------------------------------------------------------------------------|------------------------------|---|---|----------------------------------------------------------------------------------------------------------------------------------------------------------------------------------------------------------------------|-----------------------------------------------------------------------------------------------------------------------------------------------|----------------------------------------------------------------------------------------------------------------------------------------------------------------------------------------------------------|
| 3c      | dehydrogenase FadE29 (ACAD) (3-oxo-23,24-bisnorchol-4-en-22-oyl-CoA dehydrogenase beta subunit) (3-oxo-4-pregnene-20-carboxyl-CoA dehydrogenase beta subunit) | metabolism                   |   |   | dehydrogenase activity; electron carrier activity; FAD binding; fatty-acyl-CoA binding; flavin adenine dinucleotide binding; oxidoreductase activity, acting on the CH-CH group of donors, with a flavin as acceptor |                                                                                                                                               | oxidation using acyl-CoA dehydrogenase; growth of symbiont in host; lipid homeostasis; pathogenesis                                                                                                      |
| Rv3597c | Iron-regulated H-NS-like protein Lsr2                                                                                                                         | Information pathways         | Y | Y | DNA binding                                                                                                                                                                                                          | cell wall; cytosol; nucleoid; plasma membrane                                                                                                 | cellular response to oxygen levels; DNA protection; growth; pathogenesis; regulation of transcription, DNA-templated; response to hydrogen peroxide; response to iron ion; transcription, DNA-templated  |
| Rv3676  | CRP-like cAMP-activated global transcriptional regulator (cAMP receptor protein) (CRP) (cAMP regulatory protein)                                              | Regulatory proteins          | N | Y | cAMP binding; DNA binding; transcription factor activity, sequence-specific DNA binding                                                                                                                              | cell wall; plasma membrane                                                                                                                    | growth; negative regulation of transcription, DNA-templated; pathogenesis; positive regulation of transcription, DNA-templated; regulation of transcription, DNA-templated; transcription, DNA-templated |
| Rv3874  | ESAT-6-like protein EsxB (10 kDa culture filtrate antigen CFP-10) (CFP-10) (Secreted antigenic protein MTSA-10)                                               | Cell wall and cell processes | N | Y | host cell surface binding                                                                                                                                                                                            | cell wall; extracellular region; host cell endoplasmic reticulum; host cell surface; plasma membrane                                          | pathogenesis; protein secretion by the type VII secretion system                                                                                                                                         |
| Rv3875  | 6 kDa early secretory antigenic target (ESAT-6), EsxA                                                                                                         | Cell wall and cell processes | N | Y | host cell surface binding; protein homodimerization activity                                                                                                                                                         | cell wall; cytoplasm; extracellular region; host cell endoplasmic reticulum; host cell plasma membrane; host cell surface; integral component | modulation by symbiont of host signal transduction pathway; negative regulation by symbiont of host cell-mediated immune response; pathogenesis; protein secretion by the type VII secretion system      |

|             |                                                                                                                                                |                                                 |   |   |                                                                                                                                                                                                 |                                                                                              |                                                                                                                                                                                                                                                                                                                                                                                                  |
|-------------|------------------------------------------------------------------------------------------------------------------------------------------------|-------------------------------------------------|---|---|-------------------------------------------------------------------------------------------------------------------------------------------------------------------------------------------------|----------------------------------------------------------------------------------------------|--------------------------------------------------------------------------------------------------------------------------------------------------------------------------------------------------------------------------------------------------------------------------------------------------------------------------------------------------------------------------------------------------|
|             |                                                                                                                                                |                                                 |   |   |                                                                                                                                                                                                 | of membrane;<br>plasma membrane                                                              |                                                                                                                                                                                                                                                                                                                                                                                                  |
| Rv001<br>4c | Serine/threonine-<br>protein kinase<br>PknB                                                                                                    | Regulatory<br>proteins                          | Y | N | ATP binding; identical<br>protein binding;<br>manganese ion binding;<br>protein kinase activity;<br>protein<br>serine/threonine kinase<br>activity                                              | cell wall; integral<br>component of<br>membrane; plasma<br>membrane                          | growth; negative regulation of catalytic activity;<br>negative regulation of fatty acid biosynthetic<br>process; negative regulation of protein binding;<br>pathogenesis; positive regulation of catalytic<br>activity; positive regulation of DNA binding;<br>protein autophosphorylation; regulation of cell<br>shape; regulation of transferase activity;<br>response to host immune response |
| Rv001<br>5c | Serine/threonine-<br>protein kinase<br>PknA                                                                                                    | Regulatory<br>proteins                          | Y | N | ATP binding; protein<br>kinase activity; protein<br>serine/threonine kinase<br>activity                                                                                                         | cytosol;<br>extracellular region;<br>integral component<br>of membrane;<br>plasma membrane   | growth; negative regulation of catalytic activity;<br>negative regulation of fatty acid biosynthetic<br>process; negative regulation of lipid<br>biosynthetic process; pathogenesis; positive<br>regulation of catalytic activity; positive<br>regulation of DNA binding; protein<br>autophosphorylation; protein phosphorylation;<br>regulation of cell shape                                   |
| Rv001<br>6c | Penicillin-binding<br>protein A (PBPA)                                                                                                         | Cell wall<br>and cell<br>processes              | N | N | penicillin binding;<br>transferase activity                                                                                                                                                     | cell septum;<br>cytosol; integral<br>component of<br>membrane; plasma<br>membrane            | cell wall assembly; peptidoglycan biosynthetic<br>process; regulation of cell shape                                                                                                                                                                                                                                                                                                              |
| Rv001<br>7c | Uncharacterized<br>FtsW-like protein,<br>RodA                                                                                                  | Cell wall<br>and cell<br>processes              | I | N |                                                                                                                                                                                                 | integral component<br>of membrane;<br>plasma membrane                                        | cell cycle; cell division; positive regulation by<br>symbiont of host immune response                                                                                                                                                                                                                                                                                                            |
| Rv001<br>8c | PP2C-family<br>Ser/Thr<br>phosphatase<br>(Mycobacterial<br>Ser/Thr<br>phosphatase)<br>(Mstp) (Possible<br>serine/threonine<br>phosphatase Ppp) | Regulatory<br>proteins                          | N | N | magnesium ion<br>binding; manganese ion<br>binding;<br>phosphoprotein<br>phosphatase activity;<br>phosphoserine<br>phosphatase activity;<br>protein<br>serine/threonine<br>phosphatase activity | cell wall; integral<br>component of<br>membrane; integral<br>component of<br>plasma membrane | negative regulation of catalytic activity; negative<br>regulation of DNA binding; negative regulation<br>of protein kinase activity; positive regulation of<br>catalytic activity; protein dephosphorylation                                                                                                                                                                                     |
| Rv002<br>4  | Putative secreted<br>protein P60-<br>related protein                                                                                           | Virulence,<br>detoxificati<br>on,<br>adaptation | N | N |                                                                                                                                                                                                 | plasma membrane                                                                              |                                                                                                                                                                                                                                                                                                                                                                                                  |
| Rv005       | Single stranded                                                                                                                                | Information                                     | Y | N | single stranded DNA                                                                                                                                                                             | plasma membrane                                                                              |                                                                                                                                                                                                                                                                                                                                                                                                  |

|         |                                                                                                                                                                                                                                                     |                                         |   |   |                                                                             |                                                                        |                                                                                                         |
|---------|-----------------------------------------------------------------------------------------------------------------------------------------------------------------------------------------------------------------------------------------------------|-----------------------------------------|---|---|-----------------------------------------------------------------------------|------------------------------------------------------------------------|---------------------------------------------------------------------------------------------------------|
| 4       | DNA-binding protein (SSB)                                                                                                                                                                                                                           | n pathways                              |   |   | binding                                                                     | plasma membrane                                                        | DNA replication; response to antibiotic                                                                 |
| Rv0091  | 5'-methylthioadenosine/S-adenosylhomocysteine nucleosidase (MTA/SAH nucleosidase) (MTAN) (5'-methylthioadenosine nucleosidase) (MTA nucleosidase) (S-adenosylhomocysteine nucleosidase) (AdoHcy nucleosidase) (SAH nucleosidase) (SRH nucleosidase) | Intermediary metabolism and respiration | N | N | adenosylhomocysteine nucleosidase activity                                  | cytoplasm                                                              | L-methionine biosynthetic process from methylthioadenosine; nucleoside metabolic process                |
| Rv0195  | LuxR family transcriptional regulator (Possible two component transcriptional regulatory protein)                                                                                                                                                   | Regulatory proteins                     | N | N | DNA binding                                                                 | cytoplasm                                                              | regulation of transcription, DNA-templated; transcription, DNA-templated                                |
| Rv0206c | Trehalose monomycolate exporter MmpL3 (TMM exporter MmpL3)                                                                                                                                                                                          | Cell wall and cell processes            | Y | N |                                                                             | cell wall; extracellular region; integral component of plasma membrane | Actinobacterium-type cell wall biogenesis; cell wall organization; growth; lipopolysaccharide transport |
| Rv0228  | Probable integral membrane acyltransferase                                                                                                                                                                                                          | Intermediary metabolism and respiration | Y | N | transferase activity, transferring acyl groups other than amino-acyl groups | integral component of membrane; membrane                               | growth; lipopolysaccharide biosynthetic process                                                         |
| Rv0260c | Bifunctional phosphorelay system                                                                                                                                                                                                                    | Regulatory proteins                     | N | N | DNA binding; phosphorelay system III                                        | cell wall; intracellular                                               | phosphorelay signal transduction system; regulation of gene expression; regulation of                   |

|         |                                                                                                 |                                         |   |   |                                                             |                                                                                                                   |                                                                                                                                                         |
|---------|-------------------------------------------------------------------------------------------------|-----------------------------------------|---|---|-------------------------------------------------------------|-------------------------------------------------------------------------------------------------------------------|---------------------------------------------------------------------------------------------------------------------------------------------------------|
|         | -III synthetase/response regulator domain protein (Possible transcriptional regulatory protein) |                                         |   |   | synthase activity                                           |                                                                                                                   | transcription, DNA-templated; tetrapyrrole biosynthetic process                                                                                         |
| Rv0278c | Uncharacterized PE-PGRS family protein PE_PGRS3                                                 | PE/PPE                                  | N | N |                                                             |                                                                                                                   |                                                                                                                                                         |
| Rv0287  | ESAT-6-like protein EsxG (Conserved protein TB9.8)                                              | Cell wall and cell processes            | N | N |                                                             | extracellular region                                                                                              | pathogenesis                                                                                                                                            |
| Rv0350  | Chaperone protein DnaK (HSP70) (Heat shock 70 kDa protein)                                      | Virulence, detoxification, adaptation   | Y | N | ATP binding                                                 | bacterial extracellular vesicle; capsule; cell surface; cell wall; cytosol; extracellular region; plasma membrane | cellular response to superoxide; growth; protein autophosphorylation; protein folding; response to antibiotic; response to copper ion; response to heat |
| Rv0363c | Fructose-bisphosphate aldolase (FBP aldolase) (FBPA) (Fructose-1,6-bisphosphate aldolase)       | Intermediate metabolism and respiration | Y | N | fructose-bisphosphate aldolase activity; zinc ion binding   | cell wall; cytosol; extracellular region; plasma membrane                                                         | gluconeogenesis; glycolytic process                                                                                                                     |
| Rv0409  | Acetate kinase (Acetokinase)                                                                    | Intermediate metabolism and respiration | N | N | acetate kinase activity; ATP binding; magnesium ion binding | cytoplasm                                                                                                         | acetyl-CoA biosynthetic process; organic acid metabolic process                                                                                         |
| Rv0411c | ABC transporter substrate-binding protein (Probable glutamine-binding lipoprotein GlnH (GlnB))  | Cell wall and cell processes            | Y | N |                                                             | extracellular region                                                                                              | growth                                                                                                                                                  |



|         |                                                                                                                                    |                                       |   |   |                                                                                                 |                                                                       |                                                                                                                                                                                                                                                                                                                                                                                                             |
|---------|------------------------------------------------------------------------------------------------------------------------------------|---------------------------------------|---|---|-------------------------------------------------------------------------------------------------|-----------------------------------------------------------------------|-------------------------------------------------------------------------------------------------------------------------------------------------------------------------------------------------------------------------------------------------------------------------------------------------------------------------------------------------------------------------------------------------------------|
| Rv0440  | 60 kDa chaperonin 2 (65 kDa antigen) (Antigen A) (Cell wall protein A) (GroEL protein 2) (Heat shock protein 65) (Protein Cpn60-2) | Virulence, detoxification, adaptation | Y | N | ATP binding                                                                                     | cell wall; cytosol; extracellular region; plasma membrane             | adhesion of symbiont to host; growth; protein refolding; response to heat; response to hypoxia                                                                                                                                                                                                                                                                                                              |
| Rv0475  | Heparin-binding hemagglutinin (Adhesin), HbhA                                                                                      | Cell wall and cell processes          | N | N | heparin binding; identical protein binding                                                      | cell surface; cell wall; cytosol; plasma membrane                     | heterophilic cell-cell adhesion via plasma membrane cell adhesion molecules; pathogenesis; positive regulation by symbiont of host receptor-mediated endocytosis                                                                                                                                                                                                                                            |
| Rv0601c | Sensor histidine kinase component HK2                                                                                              | Regulatory proteins                   | N | N | phosphorelay sensor kinase activity; protein homodimerization activity; protein kinase activity | integral component of membrane; intracellular; plasma membrane        | negative regulation of phosphorelay signal transduction system                                                                                                                                                                                                                                                                                                                                              |
| Rv0602c | Transcriptional regulatory protein TcrA                                                                                            | Regulatory proteins                   | N | N | DNA binding; phosphorelay response regulator activity                                           | cytoplasm; plasma membrane                                            | negative regulation of phosphorelay signal transduction system; regulation of transcription, DNA-templated; transcription, DNA-templated                                                                                                                                                                                                                                                                    |
| Rv0677c | Siderophore export accessory protein MmpS5                                                                                         | Cell wall and cell processes          | N | N |                                                                                                 | extracellular region; integral component of membrane; plasma membrane | pathogenesis                                                                                                                                                                                                                                                                                                                                                                                                |
| Rv0702  | 50S ribosomal protein L4, RplD                                                                                                     | Information pathways                  | Y | N | RNA binding; rRNA binding; structural constituent of ribosome                                   | cytosol; cytosolic ribosome; plasma membrane                          | growth; translation                                                                                                                                                                                                                                                                                                                                                                                         |
| Rv0710  | 30S ribosomal protein S17, RpsQ                                                                                                    | Information pathways                  | Y | N | rRNA binding; structural constituent of ribosome                                                | cytosolic small ribosomal subunit; plasma membrane                    | growth; translation                                                                                                                                                                                                                                                                                                                                                                                         |
| Rv0757  | Possible two component system response transcriptional positive regulator PhoP                                                     | Regulatory proteins                   | Y | N | DNA binding                                                                                     | intracellular; plasma membrane                                        | glycolipid biosynthetic process; negative regulation of transcription, DNA-templated; pathogenesis; phosphorelay signal transduction system; positive regulation of gene expression; positive regulation of lipid biosynthetic process; positive regulation of transcription, DNA-templated; protein secretion by the type VII secretion system; response to oxidative stress; transcription, DNA-templated |

|         |                                                                       |                                         |   |   |                                                                                                                         |                                                                 |                                                                                                                                                                                                                             |
|---------|-----------------------------------------------------------------------|-----------------------------------------|---|---|-------------------------------------------------------------------------------------------------------------------------|-----------------------------------------------------------------|-----------------------------------------------------------------------------------------------------------------------------------------------------------------------------------------------------------------------------|
| Rv0815c | Putative thiosulfate sulfurtransferase CysA2 (Rhodanese-like protein) | Intermediate metabolism and respiration | N | N | thiosulfate sulfurtransferase activity                                                                                  | cell wall; cytosol; plasma membrane                             |                                                                                                                                                                                                                             |
| Rv0818  | Transcriptional regulatory protein                                    | Regulatory proteins                     | N | N | DNA binding                                                                                                             | intracellular; plasma membrane                                  | nitrate assimilation; phosphorelay signal transduction system; positive regulation of transcription, DNA-templated; regulation of fatty acid metabolic process; regulation of gene expression; transcription, DNA-templated |
| Rv0845  | Probable sensor histidine kinase NarS                                 | Regulatory proteins                     | N | N | protein histidine kinase activity                                                                                       | integral component of membrane; intracellular; plasma membrane  | phosphorelay signal transduction system                                                                                                                                                                                     |
| Rv0902c | Sensor-type histidine kinase PrrB                                     | Regulatory proteins                     | Y | N | ATP binding; phosphorelay sensor kinase activity; protein kinase activity                                               | cell wall; integral component of plasma membrane; intracellular | growth involved in symbiotic interaction; protein autophosphorylation                                                                                                                                                       |
| Rv0903c | Transcriptional regulatory protein PrrA                               | Regulatory proteins                     | Y | N | calcium ion binding; DNA binding; magnesium ion binding                                                                 | cytosol; plasma membrane                                        | growth involved in symbiotic interaction; phosphorelay signal transduction system; regulation of transcription, DNA-templated; transcription, DNA-templated                                                                 |
| Rv0929  | Phosphate-transport integral membrane ABC transporter PstC2           | Cell wall and cell processes            | I | N | ATPase-coupled phosphate ion transmembrane transporter activity; inorganic phosphate transmembrane transporter activity | integral component of plasma membrane                           | growth of symbiont in host                                                                                                                                                                                                  |
| Rv0930  | Probable phosphate-transport integral membrane ABC transporter PstA1  | Cell wall and cell processes            | I | N | ATPase-coupled phosphate ion transmembrane transporter activity; inorganic phosphate transmembrane transporter activity | integral component of plasma membrane                           | growth of symbiont in host                                                                                                                                                                                                  |
| Rv0946c | Glucose-6-phosphate isomerase (GPI)                                   | Intermediate metabolism and             | Y | N | glucose-6-phosphate isomerase activity                                                                                  | cytoplasm; plasma membrane                                      | glucose-6-phosphate isomerase activity; growth                                                                                                                                                                              |

|            |                                                                                                                                                                           |                                                      |   |   |                                                                                                                                                              |                                                                                                                  |                                                                                                                                                                                                                                                                                                                                                 |
|------------|---------------------------------------------------------------------------------------------------------------------------------------------------------------------------|------------------------------------------------------|---|---|--------------------------------------------------------------------------------------------------------------------------------------------------------------|------------------------------------------------------------------------------------------------------------------|-------------------------------------------------------------------------------------------------------------------------------------------------------------------------------------------------------------------------------------------------------------------------------------------------------------------------------------------------|
|            | isomerase) (PGI)<br>(Phosphohexose<br>isomerase) (PHI)                                                                                                                    | respiration                                          |   |   |                                                                                                                                                              |                                                                                                                  |                                                                                                                                                                                                                                                                                                                                                 |
| Rv098<br>1 | Mycobacterial<br>persistence<br>regulator MRPA                                                                                                                            | Regulatory<br>proteins                               | N | N | DNA binding                                                                                                                                                  | cell wall;<br>cytoplasm; plasma<br>membrane                                                                      | negative regulation of transcription, DNA-<br>templated; pathogenesis; phosphorelay signal<br>transduction system; positive regulation of<br>transcription, DNA-templated; regulation of<br>chaperone-mediated protein complex assembly;<br>regulation of transcription, DNA-templated;<br>response to stress; transcription, DNA-<br>templated |
| Rv098<br>2 | Two component<br>sensor kinase<br>MprB                                                                                                                                    | Regulatory<br>proteins                               | Y | N | ATP binding; kinase<br>activity;<br>phosphoprotein<br>phosphatase activity;<br>phosphorelay sensor<br>kinase activity                                        | extracellular region;<br>integral component<br>of membrane;<br>intracellular;<br>plasma membrane                 | growth; pathogenesis; peptidyl-histidine<br>phosphorylation; phosphorelay signal<br>transduction system                                                                                                                                                                                                                                         |
| Rv099<br>5 | GCN5 family<br>acetyltransferase<br>(Ribosomal-<br>protein-alanine<br>acetyltransferase<br>RimJ (Acetylating<br>enzyme for N-<br>terminal of<br>ribosomal protein<br>S5)) | Informatio<br>n pathways                             | N | N | N-acetyltransferase<br>activity                                                                                                                              | cytoplasm                                                                                                        | N-terminal protein amino acid acetylation                                                                                                                                                                                                                                                                                                       |
| Rv099<br>8 | Acetyltransferase<br>Pat (GCN5-like<br>enzyme) (GCN5-<br>related N-<br>acetyltransferase)<br>(GNAT) (Protein<br>acetyltransferase)<br>(Pat)                               | Conserved<br>hypothetical<br>s                       | N | N | acetyltransferase<br>activity; cAMP binding;<br>metal ion binding; N-<br>acetyltransferase<br>activity; transferase<br>activity, transferring<br>acyl groups | cytoplasm                                                                                                        |                                                                                                                                                                                                                                                                                                                                                 |
| Rv102<br>3 | Enolase (2-<br>phospho-D-<br>glycerate hydro-<br>lyase) (2-<br>phosphoglycerate<br>dehydratase)                                                                           | Intermediar<br>y<br>metabolism<br>and<br>respiration | Y | N | magnesium ion<br>binding;<br>phosphopyruvate<br>hydratase activity                                                                                           | cell surface; cell<br>wall; extracellular<br>region;<br>phosphopyruvate<br>hydratase complex;<br>plasma membrane | glycolytic process; growth                                                                                                                                                                                                                                                                                                                      |

|             |                                                                                  |                                         |   |   |                                                                                                                       |                                                             |                                                                                                                                                                                                |
|-------------|----------------------------------------------------------------------------------|-----------------------------------------|---|---|-----------------------------------------------------------------------------------------------------------------------|-------------------------------------------------------------|------------------------------------------------------------------------------------------------------------------------------------------------------------------------------------------------|
| Rv102<br>7c | Transcriptional regulatory protein KdpE                                          | Regulatory proteins                     | I | N | DNA binding                                                                                                           | cytoplasm                                                   | growth; phosphorelay signal transduction system; regulation of transcription, DNA-templated; transcription, DNA-templated                                                                      |
| Rv102<br>8c | Sensor protein KdpD                                                              | Regulatory proteins                     | N | N | ATP binding; phosphorelay sensor kinase activity                                                                      | cytoplasm; integral component of membrane; plasma membrane  | response to stress                                                                                                                                                                             |
| Rv103<br>2c | Histidine kinase (Two component sensor histidine kinase TrcS)                    | Regulatory proteins                     | N | N | ATP binding; calcium ion binding; manganese ion binding; phosphorelay sensor kinase activity; protein kinase activity | integral component of membrane; intracellular               | protein autophosphorylation                                                                                                                                                                    |
| Rv107<br>7  | Putative cystathionine beta-synthase Rv1077 (Beta-thionase) (Serine sulfhydrase) | Intermediary metabolism and respiration | N | N | cystathionine beta-synthase activity; cysteine synthase activity; pyridoxal phosphate binding                         | cell wall; cytoplasm; extracellular region; plasma membrane | cysteine biosynthetic process from serine; cysteine biosynthetic process via cystathionine                                                                                                     |
| Rv114<br>6  | Probable conserved transmembrane transport protein MmpL13b                       | Cell wall and cell processes            | N | N |                                                                                                                       | integral component of membrane                              | positive regulation by symbiont of host immune response                                                                                                                                        |
| Rv117<br>4c | Low molecular weight T-cell antigen (Low molecular weight T-cell antigen TB8.4)  | Cell wall and cell processes            | N | N | heme binding                                                                                                          | cell wall; extracellular region                             | dormancy exit of symbiont in host                                                                                                                                                              |
| Rv119<br>7  | ESAT-6-like protein EsxK                                                         | Cell wall and cell processes            | N | N |                                                                                                                       | extracellular region                                        |                                                                                                                                                                                                |
| Rv119<br>8  | ESAT-6-like protein EsxL                                                         | Cell wall and cell processes            | N | N |                                                                                                                       | cell wall; extracellular region; plasma membrane            | pathogenesis                                                                                                                                                                                   |
| Rv126<br>6c | Serine/threonine-protein kinase PknH                                             | Regulatory proteins                     | N | N | ATP binding; protein kinase activity; protein serine/threonine kinase activity                                        | cell wall; integral component of                            | negative regulation of catalytic activity; negative regulation of growth; positive regulation of catalytic activity; positive regulation of DNA binding; positive regulation of transcription, |

|         |                                                                                                 |                                         |   |   |                                                                                      |                                                                                      |                                                                                                                                                   |
|---------|-------------------------------------------------------------------------------------------------|-----------------------------------------|---|---|--------------------------------------------------------------------------------------|--------------------------------------------------------------------------------------|---------------------------------------------------------------------------------------------------------------------------------------------------|
|         |                                                                                                 |                                         |   |   |                                                                                      |                                                                                      | regulation of lipid biosynthetic process; response to host immune response                                                                        |
| Rv1312  | Conserved hypothetical secreted protein                                                         | Cell wall and cell processes            | N | N |                                                                                      | integral component of membrane                                                       |                                                                                                                                                   |
| Rv1318c | Possible adenylate cyclase (ATP pyrophosphatase) (adenylyl cyclase)                             | Intermediate metabolism and respiration | N | N | adenylate cyclase activity; signal transducer activity                               | cytosol; integral component of membrane; plasma membrane                             | cAMP biosynthetic process; intracellular signal transduction; signal transduction                                                                 |
| Rv1319c | Possible adenylate cyclase (ATP pyrophosphatase) (adenylyl cyclase)                             | Intermediate metabolism and respiration | N | N | adenylate cyclase activity; signal transducer activity                               | extracellular region; integral component of membrane; intracellular; plasma membrane | cAMP biosynthetic process; intracellular signal transduction; signal transduction                                                                 |
| Rv1388  | Putative integration host factor MihF                                                           | Information pathways                    | N | N |                                                                                      | cell wall; cytosol; plasma membrane                                                  | growth                                                                                                                                            |
| Rv1448c | Transaldolase                                                                                   | Intermediate metabolism and respiration | N | N | sedoheptulose-7-phosphate:D-glyceraldehyde-3-phosphate glyceronetransferase activity | cytosol; extracellular region                                                        | carbohydrate metabolic process; growth; pentose-phosphate shunt                                                                                   |
| Rv1456c | Membrane protein (Probable unidentified antibiotic-transport integral membrane ABC transporter) | Cell wall and cell processes            | Y | N | oxidoreductase activity, acting on the CH-CH group of donors                         | integral component of membrane                                                       | growth; heme a biosynthetic process                                                                                                               |
| Rv1642  | 50S ribosomal protein L35, RpmI                                                                 | Information pathways                    | N | N | structural constituent of ribosome                                                   | cytosolic large ribosomal subunit                                                    | translation                                                                                                                                       |
| Rv1643  | 50S ribosomal protein L20, RplT                                                                 | Information pathways                    | Y | N | rRNA binding; structural constituent of ribosome                                     | cytosolic large ribosomal subunit; plasma membrane                                   | ribosomal large subunit assembly; translation                                                                                                     |
| Rv1743  | Serine/threonine-protein kinase PknE                                                            | Regulatory proteins                     | N | N | ATP binding; protein kinase activity; protein serine/threonine kinase                | extracellular region; integral component of membrane;                                | negative regulation of catalytic activity; negative regulation of fatty acid biosynthetic process; pathogenesis; positive regulation of catalytic |

|             |                                                                                |                                                      |   |   |                                                                                                                                                                                                                           |                                                                 |                                                                                                                                                                                                                                          |
|-------------|--------------------------------------------------------------------------------|------------------------------------------------------|---|---|---------------------------------------------------------------------------------------------------------------------------------------------------------------------------------------------------------------------------|-----------------------------------------------------------------|------------------------------------------------------------------------------------------------------------------------------------------------------------------------------------------------------------------------------------------|
|             |                                                                                |                                                      |   |   |                                                                                                                                                                                                                           |                                                                 | phosphorylation; response to nitrosative stress                                                                                                                                                                                          |
| Rv174<br>6  | Serine/threonine-<br>protein kinase<br>PknF                                    | Regulatory<br>proteins                               | N | N | ATP binding; protein<br>kinase activity; protein<br>serine/threonine kinase<br>activity                                                                                                                                   | cytosol; integral<br>component of<br>plasma membrane            | barrier septum assembly; negative regulation of<br>catalytic activity; negative regulation of lipid<br>biosynthetic process; positive regulation of<br>catalytic activity; regulation of cell growth;<br>regulation of glucose transport |
| Rv179<br>3  | ESAT-6-like<br>protein EsxN                                                    | Cell wall<br>and cell<br>processes                   | N | N |                                                                                                                                                                                                                           | extracellular region;<br>plasma membrane                        |                                                                                                                                                                                                                                          |
| Rv188<br>4c | Resuscitation-<br>promoting factor<br>RpfC                                     | Cell wall<br>and cell<br>processes                   | N | N | hydrolase activity                                                                                                                                                                                                        | extracellular region                                            | negative regulation of gene expression;<br>pathogenesis; positive regulation of gene<br>expression; positive regulation of growth rate                                                                                                   |
| Rv190<br>8c | Catalase-<br>peroxidase (CP)<br>(Peroxidase/catala<br>se), KatG                | Virulence,<br>detoxificati<br>on,<br>adaptation      | N | N | catalase activity; heme<br>binding; metal ion<br>binding; NADH<br>binding; NADPH<br>binding;<br>oxidoreductase activity,<br>acting on a heme group<br>of donors, nitrogenous<br>group as acceptor;<br>peroxidase activity | cell wall; cytosol;<br>extracellular region;<br>plasma membrane | cellular response to hydrogen peroxide; evasion<br>or tolerance by symbiont of host-produced<br>reactive oxygen species; hydrogen peroxide<br>catabolic process; pathogenesis; response to<br>antibiotic; response to oxidative stress   |
| Rv191<br>5  | Putative isocitrate<br>lyase subunit A<br>(ICL) (Isocitrase)<br>(Isocitratase) | Intermediar<br>y<br>metabolism<br>and<br>respiration | I | N | isocitrate lyase activity;<br>methylisocitrate lyase<br>activity; transferase<br>activity, transferring<br>acyl groups, acyl groups<br>converted into alkyl on<br>transfer                                                | cytoplasm                                                       | glyoxylate cycle; isocitrate metabolic process                                                                                                                                                                                           |
| Rv191<br>6  | Putative isocitrate<br>lyase subunit B<br>(ICL) (Isocitrase)<br>(Isocitratase) | Intermediar<br>y<br>metabolism<br>and<br>respiration | I | N | isocitrate lyase activity;<br>transferase activity,<br>transferring acyl<br>groups, acyl groups<br>converted into alkyl on<br>transfer                                                                                    | cytoplasm                                                       | glyoxylate cycle                                                                                                                                                                                                                         |
| Rv202<br>7c | Hypoxia sensor<br>histidine kinase<br>response regulator<br>DosT               | Regulatory<br>proteins                               | N | N | ATP binding; calcium<br>ion binding; carbon<br>monoxide binding;<br>heme binding;<br>magnesium ion                                                                                                                        | cytoplasm; integral<br>component of                             | detection of hypoxia; protein                                                                                                                                                                                                            |

|         |                                                                            |                                         |     |   |                                                                                                                                                  |                                                  |                                                                                                                              |
|---------|----------------------------------------------------------------------------|-----------------------------------------|-----|---|--------------------------------------------------------------------------------------------------------------------------------------------------|--------------------------------------------------|------------------------------------------------------------------------------------------------------------------------------|
|         |                                                                            |                                         |     |   | binding; oxygen binding; oxygen sensor activity; phosphorelay sensor kinase activity; protein histidine kinase activity; protein kinase activity |                                                  |                                                                                                                              |
| Rv2048c | Polyketide synthase Pks12                                                  | Lipid metabolism                        | I+C | N | oxidoreductase activity; phosphopantetheine binding; transferase activity                                                                        | plasma membrane                                  |                                                                                                                              |
| Rv2088  | Serine/threonine-protein kinase PknJ                                       | Regulatory proteins                     | N   | N | ATP binding; cobalt ion binding; nickel cation binding; protein serine/threonine kinase activity                                                 | integral component of membrane; plasma membrane  | protein autophosphorylation; regulation of energy homeostasis                                                                |
| Rv2111c | Prokaryotic ubiquitin-like protein Pup (Bacterial ubiquitin-like modifier) | Intermediary metabolism and respiration | Y   | N | protein tag                                                                                                                                      |                                                  | growth; modification-dependent protein catabolic process; proteasomal protein catabolic process; protein pupylation          |
| Rv2145c | Cell wall synthesis protein Wag31 (Antigen 84)                             | Cell wall and cell processes            | Y   | N |                                                                                                                                                  | cell pole; cell wall; cytoplasm; plasma membrane | cell cycle; cell division; growth; peptidoglycan-based cell wall biogenesis; protein stabilization; regulation of cell shape |
| Rv2150c | Cell division protein FtsZ                                                 | Cell wall and cell processes            | Y   | N | GTPase activity; GTP binding; magnesium ion binding                                                                                              | cell division site; cytoplasm; plasma membrane   | barrier septum assembly; cell cycle; FtsZ-dependent cytokinesis; growth; protein polymerization                              |
| Rv2176  | Serine/threonine-protein kinase PknL                                       | Regulatory proteins                     | N   | N | ATP binding; protein kinase activity; protein serine/threonine kinase activity                                                                   | integral component of membrane; plasma membrane  | negative regulation of fatty acid biosynthetic process; peptidyl-threonine phosphorylation; protein autophosphorylation      |
| Rv2202c | Adenosine kinase (AK)                                                      | Intermediary metabolism and respiration | Y   | N | adenosine kinase activity; ATP binding; carbohydrate kinase activity; dGTP binding; GTP binding; magnesium ion binding                           | cytoplasm; plasma membrane                       | AMP salvage; carbohydrate phosphorylation                                                                                    |
| Rv2232  | Uncharacterized protein Rv2232, PkA                                        | Regulatory proteins                     | N   | N | magnesium ion binding; phosphatase activity                                                                                                      |                                                  |                                                                                                                              |

|             |                                                                                     |                                         |   |   |                                                                                                                   |                                       |                                                                                                                                                                                                                                                                                                                                                                                   |
|-------------|-------------------------------------------------------------------------------------|-----------------------------------------|---|---|-------------------------------------------------------------------------------------------------------------------|---------------------------------------|-----------------------------------------------------------------------------------------------------------------------------------------------------------------------------------------------------------------------------------------------------------------------------------------------------------------------------------------------------------------------------------|
|             |                                                                                     |                                         |   |   | tyrosine kinase activity                                                                                          |                                       |                                                                                                                                                                                                                                                                                                                                                                                   |
| Rv224<br>3  | Malonyl CoA-acyl carrier protein transacylase (MCT)                                 | Lipid metabolism                        | Y | N | [acyl-carrier-protein] S-malonyltransferase activity                                                              | fatty acid synthase complex           | fatty acid biosynthetic process                                                                                                                                                                                                                                                                                                                                                   |
| Rv224<br>5  | 3-oxoacyl-[acyl-carrier-protein] synthase 1 (Beta-ketoacyl-ACP synthase 1) (KAS 1)  | Lipid metabolism                        | Y | N | 3-oxoacyl-[acyl-carrier-protein] synthase activity                                                                | cell wall; cytosol; plasma membrane   | fatty acid elongation; fatty acid elongation, saturated fatty acid; growth                                                                                                                                                                                                                                                                                                        |
| Rv224<br>6  | 3-oxoacyl-[acyl-carrier-protein] synthase 2 (Beta-ketoacyl-ACP synthase 2) (KAS 2)  | Lipid metabolism                        | N | N | 3-oxoacyl-[acyl-carrier-protein] synthase activity                                                                | cell wall; cytoplasm; plasma membrane | fatty acid elongation; growth; mycolic acid biosynthetic process; response to hypoxia                                                                                                                                                                                                                                                                                             |
| Rv236<br>4c | GTPase Era                                                                          | Intermediate metabolism and respiration | Y | N | GTPase activity; GTP binding; ribosomal small subunit binding; rRNA binding; small ribosomal subunit rRNA binding | cytosol; plasma membrane              | growth; ribosomal small subunit assembly                                                                                                                                                                                                                                                                                                                                          |
| Rv237<br>6c | Low molecular weight antigen MTB12 (CFP-2) (Low molecular weight protein antigen 2) | Cell wall and cell processes            | N | N |                                                                                                                   | cell wall; extracellular region       |                                                                                                                                                                                                                                                                                                                                                                                   |
| Rv241<br>6c | Enhanced intracellular survival protein, Eis                                        | Virulence, detoxification, adaptation   | Y | N | aminoglycoside N-acetyltransferase activity                                                                       | cytoplasm                             | aminoglycoside antibiotic catabolic process; growth of symbiont in host cell; growth of symbiont in host organelle; modulation by symbiont of defense-related host reactive oxygen species production; modulation by symbiont of host innate immune response; modulation by symbiont of host programmed cell death; positive regulation by symbiont of host inflammatory response |
| Rv262<br>2  | Methyltransferase (Possible                                                         | Intermediate                            | N | N | S-adenosylmethionine-dependent                                                                                    |                                       |                                                                                                                                                                                                                                                                                                                                                                                   |



|         |                                                                       |                                         |   |   |                                                                                                                                      |                                                                        |                                                                                                                                                                                                                                                           |
|---------|-----------------------------------------------------------------------|-----------------------------------------|---|---|--------------------------------------------------------------------------------------------------------------------------------------|------------------------------------------------------------------------|-----------------------------------------------------------------------------------------------------------------------------------------------------------------------------------------------------------------------------------------------------------|
|         | (Methylase))                                                          | and respiration                         |   |   | activity                                                                                                                             |                                                                        |                                                                                                                                                                                                                                                           |
| Rv2710  | RNA polymerase sigma factor SigB                                      | Information pathways                    | Y | N | DNA binding; RNA polymerase core enzyme binding; sigma factor activity; transcription factor activity, sequence-specific DNA binding | cytosol; plasma membrane                                               | DNA-templated transcription, initiation; growth; positive regulation of transcription, DNA-templated; regulation of fatty acid metabolic process; regulation of protein secretion; response to heat; response to hypoxia; response to xenobiotic stimulus |
| Rv2884  | Probable transcriptional regulatory protein                           | Regulatory proteins                     | N | N | DNA binding                                                                                                                          | intracellular                                                          | phosphorelay signal transduction system; regulation of transcription, DNA-templated                                                                                                                                                                       |
| Rv2914c | Serine/threonine-protein kinase PknI                                  | Regulatory proteins                     | C | N | ATP binding; manganese ion binding; protein kinase activity; protein serine/threonine kinase activity                                | cytosol; integral component of membrane; plasma membrane               | pathogenesis; peptidyl-serine phosphorylation; peptidyl-threonine phosphorylation; protein autophosphorylation; regulation of growth rate                                                                                                                 |
| Rv2938  | Probable doxorubicin resistance ABC transporter permease protein DrrC | Cell wall and cell processes            | I | N | efflux transmembrane transporter activity                                                                                            | cell wall; extracellular region; integral component of plasma membrane | antibiotic transport; daunorubicin transport; doxorubicin transport; growth of symbiont in host cell; response to antibiotic; response to host immune response; transmembrane transport                                                                   |
| Rv2952  | Phthiotriol/phosphothiotriol dimycocerosates methyltransferase        | Intermediate metabolism and respiration | N | N | O-methyltransferase activity; S-adenosylmethionine-dependent methyltransferase activity                                              | cytoplasm; plasma membrane                                             | DIM/DIP cell wall layer assembly; lipid metabolic process                                                                                                                                                                                                 |
| Rv2954c | Uncharacterized protein (Methyltransferase)                           | Conserved hypotheticals                 | N | N | O-methyltransferase activity; S-adenosylmethionine-dependent methyltransferase activity                                              | cytoplasm                                                              |                                                                                                                                                                                                                                                           |
| Rv2955c | Conserved protein (Methyltransferase)                                 | Conserved hypotheticals                 | N | N | O-methyltransferase activity                                                                                                         | cell wall; cytosol; plasma membrane                                    |                                                                                                                                                                                                                                                           |

|         |                                                                                                                                          |                              |   |   |                                                                                                                                                                                                       |                                                                                                                   |                                                                                                                                                                                                                                                               |
|---------|------------------------------------------------------------------------------------------------------------------------------------------|------------------------------|---|---|-------------------------------------------------------------------------------------------------------------------------------------------------------------------------------------------------------|-------------------------------------------------------------------------------------------------------------------|---------------------------------------------------------------------------------------------------------------------------------------------------------------------------------------------------------------------------------------------------------------|
| 9c      | methyltransferase                                                                                                                        | y metabolism and respiration |   |   | activity                                                                                                                                                                                              |                                                                                                                   | DIM/DIP cell wall layer assembly; lipid biosynthetic process                                                                                                                                                                                                  |
| Rv2986c | DNA-binding protein HU homolog (21 kDa laminin-2-binding protein) (28 kDa iron-regulated protein) (Irep-28) (Histone-like protein) (Hlp) | Information pathways         | Y | N | damaged DNA binding; double-stranded DNA binding; supercoiled DNA binding                                                                                                                             | cell wall; extracellular region; plasma membrane                                                                  | cellular response to iron ion starvation; chromosome condensation; DNA protection; growth; nucleoid organization                                                                                                                                              |
| Rv3004  | Low molecular weight protein antigen 6 (CFP-6)                                                                                           | Cell wall and cell processes | N | N |                                                                                                                                                                                                       | extracellular region                                                                                              |                                                                                                                                                                                                                                                               |
| Rv3080c | Serine/threonine-protein kinase PknK (Protein kinase K)                                                                                  | Regulatory proteins          | N | N | ATP binding; identical protein binding; metal ion binding; protein kinase activity; protein serine/threonine kinase activity                                                                          | cell wall; cytosol; extracellular region; plasma membrane                                                         | pathogenesis; protein autophosphorylation; regulation of sequence-specific DNA binding transcription factor activity                                                                                                                                          |
| Rv3132c | Redox sensor histidine kinase response regulator DevS                                                                                    | Regulatory proteins          | Y | N | ATP binding; carbon monoxide binding; heme binding; magnesium ion binding; nitric oxide binding; oxygen binding; oxygen sensor activity; phosphorelay sensor kinase activity; protein kinase activity | cell wall; cytoplasm; integral component of membrane; plasma membrane                                             | detection of hypoxia; detection of redox state; growth; protein autophosphorylation; response to redox state                                                                                                                                                  |
| Rv3133c | Transcriptional regulatory protein DevR (DosR)                                                                                           | Regulatory proteins          | I | N | DNA binding; transcription factor activity, sequence-specific DNA binding                                                                                                                             | cell wall; cytosol; extracellular space; host cell cytoplasmic vesicle; host cell endosome lumen; plasma membrane | dormancy process; pathogenesis; phosphorelay signal transduction system; positive regulation of transcription, DNA-templated; regulation of fatty acid metabolic process; regulation of response to stress; response to hypoxia; transcription, DNA-templated |
| Rv3232c | Polyphosphate kinase 2                                                                                                                   | Intermediate                 | N | N | GTP binding; polyphosphate kinase                                                                                                                                                                     | plasma membrane                                                                                                   | growth of symbiont in host organelle; GTP biosynthetic process, protein                                                                                                                                                                                       |

|          |                                                                                     |                                         |   |   |                                                                                                                                            |                                                                         |                                                                                                                                                                         |
|----------|-------------------------------------------------------------------------------------|-----------------------------------------|---|---|--------------------------------------------------------------------------------------------------------------------------------------------|-------------------------------------------------------------------------|-------------------------------------------------------------------------------------------------------------------------------------------------------------------------|
|          | (Polyphosphate kinase Ppk2 (Polyphosphoric acid kinase))                            | metabolism and respiration              |   |   | activity                                                                                                                                   |                                                                         | autophosphorylation; regulation of nucleotide biosynthetic process                                                                                                      |
| Rv324 4c | Lipoprotein LpqB                                                                    | Cell wall and cell processes            | Y | N |                                                                                                                                            | cell wall; extracellular region; plasma membrane                        | growth                                                                                                                                                                  |
| Rv324 5c | Sensor histidine kinase MtrB                                                        | Regulatory proteins                     | Y | N | ATP binding; phosphorelay sensor kinase activity                                                                                           | cytosol; integral component of membrane; plasma membrane                | growth                                                                                                                                                                  |
| Rv324 7c | Thymidylate kinase (Thymidine monophosphate kinase) (dTMP kinase) (TMPK)            | Intermediary metabolism and respiration | Y | N | ATP binding; GTP binding; magnesium ion binding; protein homodimerization activity; thymidylate kinase activity; uridylate kinase activity | cytoplasm                                                               | dTDP biosynthetic process; dTTP biosynthetic process; dUDP biosynthetic process; TMP metabolic process                                                                  |
| Rv331 3c | Adenosine deaminase (Adenosine aminohydrolase)                                      | Intermediary metabolism and respiration | N | N | adenosine deaminase activity; zinc ion binding                                                                                             | cytosol                                                                 | adenosine catabolic process; hypoxanthine salvage; inosine biosynthetic process; nucleotide metabolic process; purine ribonucleoside monophosphate biosynthetic process |
| Rv341 4c | ECF RNA polymerase sigma factor SigD (Alternative RNA polymerase sigma factor SigD) | Information pathways                    | N | N | DNA binding; sigma factor activity; transcription factor activity, sequence-specific DNA binding                                           | cytoplasm                                                               | DNA-templated transcription, initiation; pathogenesis; regulation of fatty acid metabolic process; regulation of protein secretion; response to heat                    |
| Rv341 7c | 60 kDa chaperonin 1 (GroEL protein 1) (Protein Cpn60-1)                             | Virulence, detoxification, adaptation   | N | N | ATP binding; single-stranded DNA binding                                                                                                   | bacterial nucleoid; cell surface; cell wall; cytoplasm; plasma membrane | DNA protection; growth; nucleoid organization; protein refolding; response to heat                                                                                      |
| Rv345 9c | 30S ribosomal protein S11                                                           | Information pathways                    | Y | N | mRNA 5'-UTR binding; small ribosomal subunit rRNA binding; structural constituent of ribosome                                              | cytosolic small ribosomal subunit; plasma membrane                      | growth; maturation of SSU-rRNA from tricistronic rRNA transcript (SSU-rRNA, 5.8S rRNA, LSU-rRNA); ribosomal small subunit assembly; translation                         |
| Rv354 4c | Probable acyl-CoA oxidase 1                                                         | Lipid metabolism                        | N | N | FAD binding; oxidoreductase activity                                                                                                       |                                                                         | cholesterol catabolic process; fatty acid beta-oxidation                                                                                                                |

|             |                                                                                 |                     |     |   |                                                                                                                                                                                                                                             |                 |                                                                              |
|-------------|---------------------------------------------------------------------------------|---------------------|-----|---|---------------------------------------------------------------------------------------------------------------------------------------------------------------------------------------------------------------------------------------------|-----------------|------------------------------------------------------------------------------|
|             | dehydrogenase<br>FadE28                                                         |                     |     |   | acting on the CH-CH<br>group of donors                                                                                                                                                                                                      |                 | growth of symbiont in host; pathogenesis;<br>response to pH                  |
| Rv356<br>0c | Acyl-CoA<br>dehydrogenase<br>(Probable acyl-<br>CoA<br>dehydrogenase<br>FadE30) | Lipid<br>metabolism | I+C | N | acyl-CoA<br>dehydrogenase activity;<br>electron carrier activity;<br>fatty-acyl-CoA binding;<br>flavin adenine<br>dinucleotide binding;<br>oxidoreductase activity,<br>acting on the CH-CH<br>group of donors, with a<br>flavin as acceptor | plasma membrane | fatty acid beta-oxidation using acyl-CoA<br>dehydrogenase; lipid homeostasis |
| Rv356<br>2  | Acyl-CoA<br>dehydrogenase<br>(Probable acyl-<br>CoA<br>dehydrogenase<br>FadE31) | Lipid<br>metabolism | N   | N | acyl-CoA<br>dehydrogenase activity;<br>electron carrier activity;<br>fatty-acyl-CoA binding;<br>flavin adenine<br>dinucleotide binding;<br>oxidoreductase activity,<br>acting on the CH-CH<br>group of donors, with a<br>flavin as acceptor | plasma membrane | fatty acid beta-oxidation using acyl-CoA<br>dehydrogenase; lipid homeostasis |
| Rv356<br>3  | Probable acyl-<br>CoA<br>dehydrogenase<br>FadE32                                | Lipid<br>metabolism | I+C | N | acyl-CoA<br>dehydrogenase activity;<br>electron carrier activity;<br>fatty-acyl-CoA binding;<br>flavin adenine<br>dinucleotide binding;<br>oxidoreductase activity,<br>acting on the CH-CH<br>group of donors, with a<br>flavin as acceptor | cytoplasm       | fatty acid beta-oxidation using acyl-CoA<br>dehydrogenase; lipid homeostasis |
| Rv356<br>4  | Acyl-CoA<br>dehydrogenase<br>(Probable acyl-<br>CoA<br>dehydrogenase<br>FadE33) | Lipid<br>metabolism | C   | N | acyl-CoA<br>dehydrogenase activity;<br>electron carrier activity;<br>fatty-acyl-CoA binding;<br>flavin adenine<br>dinucleotide binding;<br>oxidoreductase activity,<br>acting on the CH-CH<br>group of donors, with a                       | cytoplasm       | fatty acid beta-oxidation using acyl-CoA<br>dehydrogenase; lipid homeostasis |

|             |                                                           |                        |   |   |                                                                                                                                                                       |                                                                   |                                                                                                                                                                      |
|-------------|-----------------------------------------------------------|------------------------|---|---|-----------------------------------------------------------------------------------------------------------------------------------------------------------------------|-------------------------------------------------------------------|----------------------------------------------------------------------------------------------------------------------------------------------------------------------|
|             |                                                           |                        |   |   | flavin as acceptor                                                                                                                                                    |                                                                   |                                                                                                                                                                      |
| Rv376<br>4c | Probable sensor<br>histidine kinase<br>TcrY               | Regulatory<br>proteins | N | N | ATPase activity; ATP<br>binding; calcium ion<br>binding; magnesium<br>ion binding;<br>phosphorelay sensor<br>kinase activity; protein<br>homodimerization<br>activity | cytosol; integral<br>component of<br>membrane; plasma<br>membrane | protein autophosphorylation                                                                                                                                          |
| Rv376<br>5c | Probable<br>transcriptional<br>regulatory protein<br>TcrX | Regulatory<br>proteins | N | N | DNA binding                                                                                                                                                           | cytoplasm                                                         | cellular response to iron ion starvation;<br>phosphorelay signal transduction system;<br>regulation of transcription, DNA-templated;<br>transcription, DNA-templated |
| Rv386<br>3  | Uncharacterized<br>protein                                | Regulatory<br>proteins | Y | N | DNA binding                                                                                                                                                           | cell wall; plasma<br>membrane                                     |                                                                                                                                                                      |

**Table S1:** Details of 180 candidate protein-coding genes. Cells in green color shows methylated proteins identified in the study. Cell in light pink color shows the protein for which methylation was not detected by mass spectrometer. Cells in indigo color represents proteins that were purified but not detected as methylated by western blot.

**Table S2: Methylated peptides identified by mass spectrometry.**

| Gene     | Number of sites on protein | Position within protein | Localization probability | Score diff | PE P      | Score  | Delta score | Number of Methyl (KR) | Amino acid | Sequence window                                     | Peptide window coverage                                                                                              | Methyl (KR) Probabilities                | Methyl (KR) Score diffs                                | Position in peptide | Charge | Mass error [ppm] | Intensity |
|----------|----------------------------|-------------------------|--------------------------|------------|-----------|--------|-------------|-----------------------|------------|-----------------------------------------------------|----------------------------------------------------------------------------------------------------------------------|------------------------------------------|--------------------------------------------------------|---------------------|--------|------------------|-----------|
| Rv015 3c | 3                          | 56                      | 1.00                     | 121.90     | 1.66 E-03 | 121.9  | 77.581      | 1                     | R          | RATLRR<br>LGITDV<br>ADLRSS<br>REVAR<br>RGPGR<br>VPD | XXXXXXXXPPPP<br>PPPPXXXXXXXX<br>XXXXXXXXXX                                                                           | LGITDVADLR(1)                            | LGITDVADLR(1<br>21.9)                                  | 10                  | 2      | -0.37539         | 4.21E+07  |
| Rv015 3c | 3                          | 154                     | 0.82                     | 6.71       | 5.47 E-03 | 47.68  | 44.534      | 1                     | R          | AQRAL<br>HRVVT<br>LLAAG<br>RPVLTH<br>CFAGK<br>DRTGF | XXXXXXXXPPPP<br>PPPPPPPPPP<br>PPPPPPPPPP<br>PPPPPPPPPP<br>PPPPPPPPPP<br>PPPPPPPPPP                                   | VVTLAAGR(0.824<br>)PVLTHCFAGK(0.1<br>76) | VVTLAAGR(6.7<br>1)PVLTHCFAG<br>K(-6.71)                | 9                   | 4      | 0.60576          | 2.92E+08  |
| Rv015 3c | 3                          | 164                     | 0.90                     | 9.39       | 3.68 E-14 | 125.45 | 123.34      | 1                     | K          | LLAAG<br>RPVLTH<br>CFAGK<br>DRTGF<br>VVALVL<br>EAVG | PPPPPPPPPPPP<br>PPPPPPPPPPPP<br>PPPPPPPPPPPP<br>PPPPPPPPPPPP<br>PPPPPPPPPPPP<br>PPPPPPPPPPPP                         | VVTLAAGR(0.103<br>)PVLTHCFAGK(0.8<br>97) | VVTLAAGR(-<br>9.39)PVLTHCFA<br>GK(9.39)                | 19                  | 3      | -0.19039         | 1.67E+08  |
| Rv1438   | 4                          | 103                     | 1.00                     | 90.41      | 1.14 E-06 | 90.412 | 82.002      | 1                     | R          | LAKLGCS<br>YVVVGH<br>SERRTYH<br>NEDDAL<br>VAAKA     | XXXXXXXXPPPPPP<br>PPPPPPPPPPPP<br>PPPPPPPPPPPP<br>PPPPPPPPPPPP<br>PPPPPPPPPPPP<br>PPPPPPPPPPPP                       | LGCSYVVVGHSER(1)                         | LGCSYVVVGHSER<br>(90.41)                               | 13                  | 2      | 0.11294          | 0.00E+00  |
| Rv1438   | 4                          | 139                     | 1.00                     | 96.21      | 4.12 E-06 | 96.208 | 89.076      | 1                     | R          | HGLTPIV<br>CIGEHLD<br>VREAGN<br>HVAHNI<br>EQLRG     | PPPPPPPPPPPPPP<br>PPPPPPPPPPPPPP<br>PPPPPPPPPPPPPP<br>PPPPPPPPPPPPPP<br>PPPPPPPPPPPPPP<br>PPPPPPPPPPPPPP             | HGLTPIVCIGEHLDV<br>R(1)                  | HGLTPIVCIGEHL<br>DVR(96.21)                            | 16                  | 3      | 0.37472          | 9.44E+08  |
| Rv1438   | 4                          | 181                     | 1.00                     | 118.64     | 3.11 E-24 | 118.63 | 117.9       | 1                     | R          | SVVIAYE<br>PVWAIG<br>TGRVASA<br>ADAQEV<br>CAAIR     | PPPPPPPPPPPPPP<br>PPPPPPPPPPPPPP<br>PPPPPPPPPPPPPP<br>PPPPPPPPPPPPPP<br>PPPPPPPPPPPPPP<br>PPPPPPPPPPPPPP             | GSLAGLLAEQIGSVVI<br>AYEPVWAIGTGR(1)      | GSLAGLLAEQIGS<br>VVIAYEPVWAIGT<br>GR(118.63)           | 28                  | 3      | 0.23633          | 9.39E+06  |
| Rv1438   | 4                          | 196                     | 0.56                     | 1.02       | 1.42 E-05 | 87.519 | 73.818      | 1                     | R          | RVASAA<br>DAQEVC<br>AAIRKEL<br>ASLSPRI<br>ADTV      | XXXXXXXXPPPPPP<br>PPPPPPPPPPPPPP<br>PPPPPPPPPPPPPP<br>PPPPPPPPPPPPPP<br>PPPPPPPPPPPPPP<br>PPPPPPPPPPPPPP             | VASAADAQEVCAAIR<br>(0.559)K(0.441)       | VASAADAQEVCA<br>AIR(1.02)K(-1.02)                      | 15                  | 3      | 0.17231          | 7.17E+07  |
| Rv1872c  | 1                          | 11                      | 0.99                     | 23.08      | 1.01 E-03 | 63.706 | 60.56       | 1                     | R          | —MA<br>VNRRVP<br>RVRDLAP<br>LLQFNRP<br>QFDI         | XXXXXXXXXXXXXXXX<br>XXXXXXXXXXXXXXXX<br>XXXXXXXXXXXXXXXX<br>XXXXXXXXXXXXXXXX<br>XXXXXXXXXXXXXXXX<br>XXXXXXXXXXXXXXXX | VR(0.995)DLAPLLQFN<br>R(0.005)PQFDTSK    | VR(23.08)DLAPLLQ<br>FNR(-<br>23.08)PQFDTSK(-<br>36.58) | 2                   | 4      | 0.47703          | 2.10E+07  |
| Rv2703   | 1                          | 15                      | 0.85                     | 7.41       | 2.93 E-02 | 40.496 | 21.54       | 1                     | K          | _MAATK<br>ASTATDE<br>PVKRTAT<br>KSPAASA<br>SGAK     | XXXXXXXXPPPPPP<br>PPPPPPPPPPPPPP<br>PPPPPPPPPPPPPP<br>PPPPPPPPPPPPPP<br>PPPPPPPPPPPPPP<br>PPPPPPPPPPPPPP             | ASTATDEPVK(0.846)R<br>(0.154)            | ASTATDEPVK(7.41<br>)R(-7.41)                           | 10                  | 2      | -0.0037856       | 4.26E+07  |
| Rv2875   | 1                          | 118                     | 1.00                     | 96.34      | 7.98 E-04 | 96.342 | 58.998      | 1                     | K          | NAAFSKL<br>PASTIDE<br>LKTINSL<br>LTSILTY<br>HVV     | XXXXXXXXPPPPPP<br>PPPPPPPPPPPPPP<br>PPPPPPPPPPPPPP<br>PPPPPPPPPPPPPP<br>PPPPPPPPPPPPPP<br>PPPPPPPPPPPPPP             | LPASTIDELK(1)                            | LPASTIDELK(96.34<br>)                                  | 10                  | 2      | 0.33379          | 2.51E+05  |
| Rv2889c  | 4                          | 100                     | 1.00                     | 58.12      | 7.36 E-03 | 58.123 | 50.038      | 1                     | K          | FQTLAD<br>QVAAA<br>AAAKPA<br>DVDALK<br>GASIGD<br>K  | PPPPPPPPPPPPPP<br>PPPPPPPPPPPPPP<br>PPPPPPPPPPPPPP<br>PPPPPPPPPPPPPP<br>PPPPPPPPPPPPPP<br>PPPPPPPPPPPPPP             | NAEFQTLADQVVAA<br>AAAAK(1)               | NAEFQTLADQVV<br>AAAAAK(58.12)                          | 19                  | 2      | 1.0924           | 1.56E+07  |
| Rv2889c  | 4                          | 150                     | 1.00                     | 95.26      | 9.41 E-05 | 95.264 | 92.296      | 1                     | R          | RRVAIFD<br>GTVEAY<br>LHRRSAD<br>IPPAVGV             | XXXXXXXXPPPPPP<br>PPPPPPPPPPPPPP<br>PPPPPPPPPPPPPP<br>PPPPPPPPPPPPPP<br>PPPPPPPPPPPPPP<br>PPPPPPPPPPPPPP             | VAIHFGTVEAYLHR(1<br>)                    | VAIHFGTVEAYLH<br>R(95.26)                              | 14                  | 3      | -0.44689         | 1.08E+08  |

|         |    |     |      |            |              |        |        |     |   |                                                 |                                                           |                                                       |                                                       |    |   |          |              |
|---------|----|-----|------|------------|--------------|--------|--------|-----|---|-------------------------------------------------|-----------------------------------------------------------|-------------------------------------------------------|-------------------------------------------------------|----|---|----------|--------------|
| Rv2889c | 4  | 151 | 0.58 | 1.39       | 5.07<br>E-08 | 116.51 | 89.739 | 1   | R | RVAIFDG<br>TVEAYL<br>HRRSADL<br>PPAVGVL<br>VEYR | XPPPPPPPPPPPP<br>PXXXXXXXXXXXX<br>XXXXX                   | VAFIDGTVEAYLHR(0<br>421)R(0.579)                      | VAFIDGTVEAYLH<br>R(-1.39)R(1.39)                      | 15 | 4 | -0.515   | 1.84E+0<br>8 |
| Rv2889c | 4  | 262 | 1.00 | 81.9<br>2  | 6.84<br>E-03 | 81.92  | 48.831 | 1   | R | KTVKAL<br>LDVAGV<br>TVTRFVR<br>FEVGQA           | XXXXPPPPPPPPPP<br>PXXXXXXXXXXXX<br>XXXXX                  | ALLDVAGVTVTR(1)                                       | ALLDVAGVTVTR(<br>81.92)                               | 12 | 2 | -0.31422 | 9.02E+0<br>7 |
| Rv3246c | 13 | 46  | 1.00 | 101.<br>92 | 6.81<br>E-09 | 101.92 | 89.033 | 1   | R | DTAVIG<br>DGTQAL<br>TAVREL<br>PDLVLLD<br>LMLPG  | PPPPPPPPPPPPPP<br>PXXXXXXXXXXXX<br>XXXXX                  | GEGFDTAVIGDGTQ<br>ALTAVR(1)                           | GEGFDTAVIGDGTQ<br>ALTAVR(101.92)                      | 20 | 2 | 0.37687  | 6.33E+0<br>7 |
| Rv3246c | 13 | 72  | 1.00 | 74.7<br>9  | 8.23<br>E-04 | 82.877 | 70.385 | 1   | R | LMLPGM<br>NGIDVC<br>RVLRAVS<br>GVPIVML<br>TAKTD | XXXXXXXXXXXXXX<br>XPPPPPPPPPPPP<br>PPPPX                  | VLR(1)ADSGVPIVMLT<br>AK                               | VLR(74.79)ADSGVP<br>IVMLTAK(-74.79)                   | 3  | 2 | -0.1078  | 2.84E+0<br>8 |
| Rv3246c | 13 | 85  | 1.00 | 41.6<br>2  | 1.69<br>E-03 | 67.997 | 63.481 | 1   | K | VLRADS<br>GVPIVML<br>TAKTDT<br>VDVVLG<br>LESAD  | XXXXPPPPPPPPPP<br>PXXXXXXXXXXXX<br>XXXXX                  | ADSGVPIVMLTAK(1)                                      | ADSGVPIVMLTAK<br>(41.62)                              | 13 | 2 | 0.98921  | 2.70E+0<br>8 |
| Rv3246c | 13 | 105 | 0.85 | 6.70       | 2.19<br>E-45 | 165.1  | 155.7  | 1,2 | K | DVVLGL<br>ESGADD<br>YIMKPK<br>PKELVAR<br>VRARL  | PPPPPPPPPPPPPP<br>PPPPPPPPPPPP<br>PPPPPPPPPPPP<br>XXX     | TDTVDDVVLGLES<br>GADDYIMK(0.85)PFK(0.8<br>5)PK(0.299) | TDTVDDVVLGLES<br>GADDYIMK(6.7)PF<br>K(6.7)PK(6.7)     | 20 | 4 | 0.58761  | 8.73E+0<br>8 |
| Rv3246c | 13 | 108 | 0.85 | 6.70       | 2.19<br>E-45 | 128.88 | 127.21 | 2   | K | LGLES<br>DDYIMK<br>PFKPKEL<br>VARVAR<br>RLRRN   | PPPPPPPPPPPPPP<br>PPPPPPPPPPPP<br>PPPPPPPPPPPP<br>XXXX    | TDTVDDVVLGLES<br>GADDYIMK(0.85)PFK(0.8<br>5)PK(0.299) | TDTVDDVVLGLES<br>GADDYIMK(6.7)PF<br>K(6.7)PK(6.7)     | 23 | 4 | 0.58761  | 7.59E+0<br>8 |
| Rv3246c | 13 | 110 | 0.74 | 1.55       | 5.28<br>E-12 | 88.872 | 85.75  | 2   | K | LESAD<br>DYIMKPK<br>KPKELV<br>ARVRARL<br>RRNDD  | PPPPPPPPPPPPPP<br>PPPPPPPPPPPP<br>PPPPPPPPPPPP<br>XXXX    | TDTVDDVVLGLES<br>GADDYIMK(0.63)PFK(0.6<br>3)PK(0.741) | TDTVDDVVLGLES<br>GADDYIMK(0)PFK<br>(0)PK(1.55)        | 25 | 3 | 0.47793  | 1.41E+0<br>8 |
| Rv3246c | 13 | 122 | 1.00 | 127.<br>78 | 9.00<br>E-34 | 162.11 | 157.8  | 1   | R | FKPKELV<br>ARVRARL<br>RRNDD<br>PAEMLSI<br>ADVE  | XXXXXXXXXXXXXX<br>XPPPPPPPPPPPP<br>PPPPPPPPPPPP<br>PPPPP  | R(1)NDDEPAEMLSIA<br>DVEIDVPAHK                        | R(127.78)NDDEPA<br>EMLSIA DVEIDV<br>PAHK(-127.78)     | 1  | 4 | -0.77349 | 5.98E+0<br>8 |
| Rv3246c | 13 | 144 | 1.00 | 101.<br>36 | 1.98<br>E-58 | 207.17 | 206.06 | 1   | K | EMLSIAD<br>VEIDVPA<br>HKVTRN<br>GEQISLT<br>PLEF | PPPPPPPPPPPPPP<br>PPPPPPPPPPPP<br>PPPPPPPPPPPP<br>XXXX    | RNDDEPAEMLSIA<br>DVEIDVPAHK(1)                        | R(-<br>101.36)NDDEPAE<br>MLSIA DVEIDV<br>PAHK(101.36) | 23 | 4 | -0.67454 | 2.11E+0<br>9 |
| Rv3246c | 13 | 167 | 1.00 | 56.0<br>2  | 5.85<br>E-19 | 143.46 | 139.38 | 1   | R | ISLTPLF<br>DLLVALA<br>RKPRQV<br>FTRDVL<br>EQV   | PPPPPPPPPPPPPP<br>PPPPPPPPPPPP<br>PPPPPPPPPPPP<br>XXXX    | NGEQISLTPLF<br>DLLVALAR(1)                            | NGEQISLTPLF<br>DLLVALAR(56.02)                        | 20 | 3 | -1.2252  | 1.40E+0<br>8 |
| Rv3246c | 13 | 200 | 1.00 | 65.2<br>5  | 9.71<br>E-03 | 79.469 | 61.649 | 1   | R | YRHPAD<br>TRLVNV<br>HVQRLR<br>AKVEKD<br>PENPTVV | XXXXXXXXPPPPPP<br>PPPPPPPPPPPP<br>PPPPPPPPPPPP<br>XXXXXX  | LVNVHVQR(1)                                           | LVNVHVQR(65.25)                                       | 8  | 2 | -0.13874 | 2.30E+0<br>8 |
| Rv3246c | 13 | 204 | 1.00 | 94.9<br>4  | 1.03<br>E-19 | 149.47 | 146.56 | 1,2 | K | ADTRLV<br>NVHVQR<br>LRAKVE<br>KDPENP<br>TVVLTVR | XXXXXXXXXXXXXX<br>XPPPPPPPPPPPP<br>PPPPPPPPPPPP<br>PPPPP  | AK(1)VEK(1)DPENPT<br>VTVR                             | AK(94.94)VEK(95.2)<br>DPENPTVTVR(-<br>94.94)          | 2  | 4 | -0.23266 | 5.58E+0<br>8 |
| Rv3246c | 13 | 207 | 1.00 | 90.5<br>7  | 7.82<br>E-25 | 185.26 | 176.26 | 1,2 | K | RLVNVH<br>VQRLRA<br>KVEKDP<br>ENPTVVL<br>TVRGGV | XXXXXXXXXXXXXP<br>PPPPPPPPPPPPPP<br>PPPPPPPPPPPP<br>PXXXX | VEK(1)DPENPTVTVR                                      | VEK(90.57)DPENP<br>TVVLTVR(-90.57)                    | 3  | 3 | 0.35713  | 2.64E+0<br>9 |
| Rv3246c | 13 | 219 | 1.00 | 93.6<br>1  | 1.49<br>E-10 | 109.72 | 107.79 | 1   | R | KVEKDP<br>ENPTVVL<br>TVRGGV<br>VKAGDP           | PPPPPPPPPPPPPP<br>PXXXXXXXXXXXX<br>XXXXX                  | DPENPTVTVR(1)                                         | DPENPTVTVR(<br>93.61)                                 | 12 | 2 | 0.84151  | 1.53E+0<br>8 |



|         |   |     |      |        |          |        |        |   |   |                                                     |                                         |                                            |                                                   |    |   |          |          |
|---------|---|-----|------|--------|----------|--------|--------|---|---|-----------------------------------------------------|-----------------------------------------|--------------------------------------------|---------------------------------------------------|----|---|----------|----------|
| Rv3248c | 5 | 8   | 1.00 | 60.44  | 1.63E-02 | 60.436 | 38.665 | 1 | K | MTGNLV<br>TKNSLTP<br>DVRNGI<br>DFKI                 | XXXXXXXXXXPP<br>PPPPXXXXXXXX<br>XXXXXXX | TGNLVTK(1)                                 | TGNLVTK(60.44)                                    | 7  | 1 | -0.24929 | 2.40E+05 |
| Rv3248c | 5 | 276 | 1.00 | 61.78  | 7.06E-03 | 61.78  | 41.081 | 1 | K | LIDGINR<br>GTDALIG<br>GKKVLIC<br>YGDVVG<br>KGCA     | XXXXXXXXPPPP<br>PPPPPPPPPP<br>XXXXXX    | GTDALIGGK(1)                               | GTDALIGGK(61.78)                                  | 9  | 2 | 0.032999 | 0.00E+00 |
| Rv3248c | 5 | 277 | 1.00 | 64.49  | 2.96E-03 | 67.136 | 55.217 | 1 | K | IDGINRG<br>TDALIGG<br>KKVLICG<br>YGDVVG<br>GCAE     | XXXXXXXXXXXX<br>PPPPPPPPPP<br>PXXXX     | K(1)VLICGYDVGK                             | K(64.49)VLICGYDVGK(-64.49)                        | 1  | 2 | 0.11205  | 2.46E+08 |
| Rv3248c | 5 | 448 | 1.00 | 199.80 | 1.05E-68 | 199.8  | 199.8  | 1 | R | IELWTK<br>NDEYDN<br>EVYRLPK<br>HLDEKV<br>ARIHVE     | XXXXXPPPPPP<br>PPPPPPPPPP<br>XXXXXX     | NDEYDNEVYR(1)                              | NDEYDNEVYR(199.8)                                 | 10 | 2 | 0.22627  | 9.98E+05 |
| Rv3248c | 5 | 471 | 1.00 | 90.61  | 4.41E-06 | 95.822 | 88.765 | 1 | K | KVARIHV<br>EALGGH<br>LTKLTKE<br>QAEYLG<br>VDVEG     | XXXXPPPPPPPP<br>PPPPPPPPPP<br>XXXX      | IHVEALGGHLTK(1)                            | IHVEALGGHLTK(90.61)                               | 12 | 2 | 1.3323   | 3.40E+08 |
| Rv3846  | 6 | 38  | 1.00 | 95.36  | 6.04E-27 | 166.03 | 162.83 | 1 | K | QINELH<br>HSKHHA<br>TYVKG<br>NDAVAK<br>LEEARK       | XXXXXXXXXXPP<br>PPPPPPPPPP<br>XXXXXX    | HHATYVK(1)GANDAVAK                         | HHATYVK(95.36)GANDAVAK(-95.36)                    | 7  | 3 | 0.33384  | 1.27E+08 |
| Rv3846  | 6 | 46  | 1.00 | 26.09  | 2.06E-02 | 56.569 | 43.292 | 1 | K | KHHATY<br>VKGAND<br>AVAKLE<br>EARAKE<br>DHSAILL     | XXXXXXXXPPPP<br>PPPPPPPPPP<br>XXXXXX    | GANDAVAK(0.998)LEEAR(0.002)                | GANDAVAK(26.09)LEEAR(-26.09)                      | 8  | 3 | -0.9437  | 1.19E+08 |
| Rv3846  | 6 | 53  | 1.00 | 71.63  | 8.50E-04 | 91.307 | 69.532 | 1 | K | KGANDA<br>VAKLEE<br>ARAKED<br>HSAILLN<br>EKNLAF     | XXXXXXXXXX<br>XXPPPPPPPP<br>PXXXX       | AK(1)EDHSAILLNEK                           | AK(71.63)EDHSAILLNEK(-71.63)                      | 2  | 3 | 1.6193   | 1.31E+08 |
| Rv3846  | 6 | 81  | 1.00 | 88.39  | 3.12E-06 | 88.385 | 81.149 | 1 | K | LAFNLA<br>GHVNHT<br>IWWKNL<br>SPNGGD<br>KPTGEL<br>A | PPPPPPPPPP<br>PPPPPPPPPP<br>XXXX        | NLAFNLAGHVNHTIWWK(1)                       | NLAFNLAGHVNHTIWWK(88.39)                          | 17 | 3 | -0.16001 | 4.21E+08 |
| Rv3846  | 6 | 110 | 0.58 | 1.38   | 2.80E-18 | 99.536 | 95.414 | 1 | R | LAAAAD<br>AFGSFD<br>KFRAQF<br>HAAATT<br>VQSGW       | PPPPPPPPPP<br>PPPPPPPPPP<br>XXXX        | NLSPNGGDKPTGELAAAADAFGSFDK(0.421)FR(0.579) | NLSPNGGDK(-63.49)PTGELAAAADAFGSFDK(-1.38)FR(1.38) | 29 | 4 | 0.017534 | 3.98E+07 |
| Rv3846  | 6 | 179 | 1.00 | 135.69 | 3.09E-42 | 183.22 | 169.9  | 1 | K | HAFYLQ<br>YKNVKV<br>DFAKAF<br>WNVVN<br>WADVQS<br>RY | XXXXXXXXXX<br>PPPPPPPPPP<br>PPPX        | VDFAK(1)AFWNVVNWADVQSR                     | VDFAK(135.69)AFWNVVNWADVQSR(-135.69)              | 5  | 2 | -0.27803 | 6.36E+07 |

**Table S3:** The table shows mass spectrometric signal defined by the type of identification- either by “MS/MS” or by “match between run event (matching)”. The fold change in signal intensities are shown relative to those in MtrA.

| Amino acid position | Identification type |            |            |            | Fold change over WT |            |            |
|---------------------|---------------------|------------|------------|------------|---------------------|------------|------------|
|                     | WT                  | MtrA-R122M | MtrA-K207M | MtrA-K204M | MtrA-R122M          | MtrA-K207M | MtrA-K204M |
| K85                 | MS/MS               | matching   | MS/MS      |            | 0.334               | 0.463      | 0.000      |
| K105                | matching            | matching   | MS/MS      | MS/MS      | 0.054               | 0.000      | 0.211      |
| K108                | matching            | matching   | MS/MS      | MS/MS      | 0.054               | 0.240      | 0.060      |
| K110                | matching            | matching   | MS/MS      | MS/MS      | 0.048               | 0.240      | 0.058      |
| R122                | MS/MS               | MS/MS      | MS/MS      | MS/MS      | 0.022               | 0.103      | 0.243      |
| K144                | MS/MS               | MS/MS      | MS/MS      | MS/MS      | 0.047               | 0.181      | 0.235      |
| R200                | MS/MS               | MS/MS      | MS/MS      |            | 0.339               | 0.530      | 0.000      |
| K204                | MS/MS               | MS/MS      |            |            | 0.020               | 0.000      | 0.000      |
| K207                | MS/MS               | MS/MS      | matching   |            | 0.503               | 0.004      | 0.000      |
| R219                | MS/MS               | MS/MS      |            | matching   | 0.331               | 0.000      | 0.009      |
